# Supplementary material
Source: PubMed Central journal article supplement (PMC4914189)
Supplement: pnas.1600899113.sapp.pdf [file pnas.1600899113.sapp.pdf]

# 1 **SI Appendix**

## 2 **Draft genome of the peanut A-genome progenitor (*Arachis*** 3 ***duranensis*) provides insights into geocarpy, oil biosynthesis and** 4 **allergens**

5

6 Xiaoping Chen<sup>1,§</sup>, Hongjie Li<sup>2,§</sup>, Manish K. Pandey<sup>3,§</sup>, Qingli Yang<sup>4,8,§</sup>, Xiyin Wang<sup>5,§</sup>, Vanika  
7 Garg<sup>3</sup>, Haifen Li<sup>1</sup>, Xiaoyuan Chi<sup>4</sup>, Dadakhalandar Doddamani<sup>3</sup>, Yanbin Hong<sup>1</sup>, Hari D.  
8 Upadhyaya<sup>3</sup>, Hui Guo<sup>5</sup>, Aamir W. Khan<sup>3</sup>, Fanghe Zhu<sup>1</sup>, Xiaoyan Zhang<sup>2</sup>, Lijuan Pan<sup>4</sup>, Gary J.  
9 Pierce<sup>5</sup>, Guiyuan Zhou<sup>1</sup>, Katta AVS Krishnamohan<sup>3</sup>, Mingna Chen<sup>4</sup>, Ni Zhong<sup>1</sup>, Gaurav Agarwal<sup>3</sup>,  
10 Shuanzhu Li<sup>2</sup>, Annapurna Chitikineni<sup>3</sup>, Guoqiang Zhang<sup>7</sup>, Shivali Sharma<sup>3</sup>, Na Chen<sup>4</sup>, Haiyan  
11 Liu<sup>1</sup>, Pasupuleti Janila<sup>3</sup>, Shaoxiong Li<sup>1</sup>, Min Wang<sup>2</sup>, Tong Wang<sup>4</sup>, Jie Sun<sup>4</sup>, Xingyu Li<sup>1</sup>, Chunyan  
12 Li<sup>2</sup>, Mian Wang<sup>4</sup>, Lina Yu<sup>4</sup>, Shijie Wen<sup>1</sup>, Sube Singh<sup>3</sup>, Zhen Yang<sup>4</sup>, Jinming Zhao<sup>2</sup>, Chushu  
13 Zhang<sup>4</sup>, Yue Yu<sup>6</sup>, Jie Bi<sup>4</sup>, Xiaojun Zhang<sup>8</sup>, Zhongjian Liu<sup>7,\*</sup>, Andrew H. Paterson<sup>5,\*</sup>, Shuping  
14 Wang<sup>2,\*</sup>, Xuanqiang Liang<sup>1,\*</sup>, Rajeev K. Varshney<sup>3,9,\*</sup>, Shanlin Yu<sup>4,\*</sup>

15 <sup>1</sup>Crops Research Institute, Guangdong Academy of Agricultural Sciences (GAAS), South China  
16 Peanut Sub-center of National Center of Oilseed Crops Improvement, Guangdong Key Laboratory  
17 for Crops Genetic Improvement, Guangzhou, China

18 <sup>2</sup>Shandong Shofine Seed Company, Jiexiang, China

19 <sup>3</sup>International Crops Research Institute for the Semi-Arid Tropics (ICRISAT), Hyderabad, India

20 <sup>4</sup>Shandong Peanut Research Institute, Shandong Academy of Agricultural Sciences, Qingdao,  
21 China

22 <sup>5</sup>Plant Genome Mapping Laboratory, University of Georgia, Athens, USA

23 <sup>6</sup>Macrogen Millennium Genomics Company, Shenzhen, China

24 <sup>7</sup>Shenzhen Key Laboratory for Orchid Conservation and Utilization, National Orchid  
25 Conservation Center of China and Orchid Conservation and Research Center of Shenzhen,  
26 Shenzhen, China

27 <sup>8</sup>College of Food Science and Engineering of Qingdao Agricultural University, Qingdao, China

28 <sup>9</sup>The University of Western Australia, Crawley, Australia

29 <sup>§</sup> These authors contributed equally to this work.

30 \*Correspondence should be addressed to S.Y. ([yshanlin1956@163.com](mailto:yshanlin1956@163.com)), R.V.  
31 ([r.k.varshney@cgiar.org](mailto:r.k.varshney@cgiar.org)), X.L. ([liang-804@163.com](mailto:liang-804@163.com)), S.W. ([wsp@shofine.com](mailto:wsp@shofine.com)), A.P.  
32 ([paterson@uga.edu](mailto:paterson@uga.edu)) or Z.L. ([liuzj@sinicaorchid.org](mailto:liuzj@sinicaorchid.org)).

33

34 *SI Text*

## 35 **1. Sequencing and assembly of *Arachis duranensis***

### 36 **1.1 Plant material**

37 *Arachis duranensis* (AA 2n=2x=20) is the progenitor species of the cultivated  
38 peanut<sup>1,2</sup> (**Fig. S1**). The *A. duranensis* (represented as accession PI475845) was  
39 sequenced by Illumina HiSeq2500 sequencing platform. Genomic DNA was extracted  
40 from the etiolated leaves of 20-day-old plants growing in dark chamber using the  
41 CTAB method<sup>3</sup>.

### 42 **1.2 Illumina shotgun sequencing**

43 Genomic DNA was isolated from caulicle, leaf and root by standard molecular  
44 biology techniques. Subsequently, short-insert libraries (250-bp, 500-bp & 800-bp)  
45 and long-insert libraries (2-kb, 5-kb, 10-kb & 20-kb for BP) were constructed using  
46 the standard protocol provided by Illumina (San Diego, USA). Paired-end sequencing  
47 with whole genome shotgun sequencing strategy was performed using the Illumina  
48 HiSeq 2500 platform. We finally obtained ca. 229.94G reads for next filter step  
49 (**Table S1**).

### 50 **1.3 *De novo* assembly of the *A. duranensis* genome**

51 The schematic strategy for *de novo* assembly is displayed in **Fig. S2**. Sequencing  
52 errors will largely disturb the short-read assembly algorithms. We therefore utilized  
53 several highly stringent filtering steps to remove low-quality reads as follows: (1)  
54 reads of short-insert libraries were trimmed of 4 low-quality bases at both ends, and  
55 reads of long-insert libraries were trimmed of 3 low-quality bases; (2) for long-insert  
56 libraries, duplicated reads were filtered out; (3) we also examined individual reads in  
57 all lanes, and discarded reads with 10 or more Ns (no sequenced bases) and low-  
58 quality bases.

59 We finally obtained 159.07G filtered reads for genome assembling. We employed  
60 SOAPdenovo2<sup>4</sup> (version 2.04.4) with optimized parameters (pregraph -K 79 -p 16 -d  
61 5; scaff -F -b 1.5) to construct contigs and original scaffolds. This paired-end  
62 information was subsequently applied to link contigs into scaffolds in a stepwise  
63 manner. Several intra-scaffold gaps were filled by local assembly using the reads in a  
64 read-pair where one end uniquely mapped to a contig whereas the other end was  
65 located within a gap. Subsequently, SSPACE<sup>5</sup> (version 2.0; using core parameters “-k  
66 6 -T 4 -g 2”) was used to link the SOAPdenovo2 scaffolds. Overall, various assembly  
67 software were employed to generate a draft genome of *A. duranensis* consisting of  
68 8,173 scaffolds with a total of 1,051,523,805 bp (avg. size: 128,658; N50 size:  
69 649,840) and 90,568 contigs (N50 size: 29,584) (**Table 1** and **Table S2**). Out of 8,173  
70 scaffolds, 3,996 with length  $\geq 2$  Kb account for 1.048 Gb of the genome (**Table S3**).

71

## 72 **1.4 Evaluation of the assembly**

### 73 **1.4.1 PCR amplification**

74 We evaluated the *A. duranensis* assembled genome using PCR method. A total of 411  
75 genomic fragments from the assembled genome were randomly selected for designing  
76 PCR primers. Of the 411 pairs of primers, ~89% can be amplified the right size of  
77 product from the genomic DNA of PI475845 (**Table S4** and **Fig. S3**). All primers used  
78 in this study were provided in **Dataset S1**.

### 79 **1.4.2 Per-base accuracy of read data and sequence depth**

80 The accuracy of a genome assembly depends partially on the high quality of  
81 sequenced reads, which has a great impact on subsequent analyses. Base errors in the  
82 sequenced fragments can not only lead to the deviation of assembly, but also result in  
83 the incorrect annotation of functional elements in downstream analyses. The read  
84 length and quality distributions were thus explored (**Fig. S4**). Nearly all reads below

85 1000 bp have high quality ( $Q > 20$ ). The high-quality data guarantees the single base  
86 accuracy of the assembled genome and the correct annotation of functional elements  
87 like protein-coding genes, transcription factors and small RNAs. The sequencing depth  
88 of 93.27% genomic regions was  $\geq 10x$  and its peak locates at 48x (**Fig. S5**), indicating  
89 that these regions had high single-base accuracy<sup>6</sup>.

#### 90 **1.4.3 EST and Transcriptome Sequence Assembly (TSA) mapping**

91 The gene coverage of the assembled genome was comprehensively evaluated using  
92 available transcript sequence tags or ESTs. We used the RNA-seq data<sup>7</sup> generated in-  
93 house and downloaded from the Sequence Read Archive (SRA)  
94 (<http://www.ncbi.nlm.nih.gov/Traces/sra/>). We aligned the transcripts to the genome  
95 using SSAHA2<sup>8</sup> with default parameters except for '-best 1'. A total of 50,281  
96 (approximately 99% of the predicted genes) genes were supported by at least one  
97 transcripts (**Fig. S6**).

#### 98 **1.5 Estimation of the genome size based on 25-mer analysis**

99 The genome size was estimated based on the K-mer distribution using ~79 Gb of  
100 high-quality short reads. A k-mer refers to a total number of sub-sequences of length k  
101 which could be obtained from a sequenced DNA read. The genome size was evaluated  
102 using the total length of sequence reads divided by sequencing depth. To estimate the  
103 sequencing depth, the frequency of each 25-mer were calculated from the whole  
104 genome sequenced reads. We used the algorithm:  $(N \times (L - K + 1) - B) / D = G$ , where  
105 N is the total sequence read number, L is the average length of sequence reads and K  
106 is K-mer length, defined as 25 bp here, B is the total number of low frequency 25-  
107 mer, G denotes the genome size, and D is the overall depth estimated from K-mer  
108 distribution (**Table S7**). An average of 57.14x read depth was obtained with an  
109 estimated genome size of 1,381,794,909 bp, consistent with the prior data<sup>9</sup>.

110

## 111 **2. Genome annotation**

### 112 **2.1 Gene prediction**

113 To annotate the *A. duranensis* genome, we used an automated genome annotation  
114 pipeline MAKER<sup>10</sup> which aligns and filters EST and protein homology evidence,  
115 produces *de novo* gene prediction, infers 5' and 3' UTR, and integrates these data to  
116 generate final downstream gene models with quality control statistics. Several  
117 iterative runs of MAKER were used to produce the final gene set. In total, 50,324  
118 gene models for *A. duranensis* were predicted in this study (**Table 1**).

### 119 **2.2 Gene function annotation**

120 All predicted protein sequences were functionally annotated using the BLAST+  
121 (version 2.2.27) with a threshold E-value of 1e-5 against a variety of protein and  
122 nucleotide databases, including the NCBI nucleotide (NT), the non-redundant protein  
123 (NR), the Conserved Domain Database (CDD)<sup>11</sup>, the UniProtKB ([www.uniprot.org](http://www.uniprot.org)),  
124 Pfam<sup>12,13</sup> and the Gene Ontology (GO)<sup>14</sup>. The *A. duranensis* genes were also mapped  
125 to the Kyoto Encyclopedia of Genes and Genomes (KEGG) pathway maps of KEGG  
126 databases<sup>15</sup>. To infer functions for the predicted genes, InterProScan<sup>16,17</sup> was used to  
127 search the predicted genes against the protein signature from InterPro with default  
128 parameters. Fifteen gene sets from legumes, oilseed crops and other plant species  
129 were used for comparative analysis (**Table S8**). A Cytoscape plugin BiNGO was used  
130 for enrichment analysis with hypergeometric test and Benjamini multiple testing  
131 correction at a significance level of 0.01<sup>18</sup>.

### 132 **2.3 Identification of gene and transcription factor families**

133 Comparative analysis of gene family evolution including expansion, contraction,  
134 formation or extinction can reveal evolutionary events underlying species  
135 adaptation<sup>19</sup>. The software OrthoMCL (version 2.09)<sup>20</sup> was employed to identify  
136 orthologous gene families in the *A. duranensis* genome. To cluster protein-coding

137 genes into gene families, pairwise sequence similarity analysis was performed using  
138 BLASTP with an E-value cutoff of 1e-5 and a minimum aligned coverage of 50%.  
139 The reciprocal best hit matrix served as the basis for ortholog definition using  
140 OrthoMCL. The gene sets used in this study are listed in **Table S8**. A total of 832,953  
141 sequences from sixteen plant species were grouped into 54,384 gene clusters, of  
142 which 4,575 clusters contained 237,686 genes common to all sixteen genomes, and  
143 1,423 were specific for *A. duranensis*, suggesting that new gene families may have  
144 emerged after *Arachis* divergence from other legumes ~50 Mya<sup>21</sup>. These specific  
145 clusters are comprised of 16,472 genes, more than in other examined species except  
146 canola (**Table S13** and **Fig. S19**). Gene Ontology (GO) annotation indicated  
147 differentially enriched functional categories in peanut-specific families (**Fig. S20** and  
148 **S21**), suggesting that new gene families may reflect *Arachis* speciation and adaptation  
149 to specific habitats, for example by geocarpy. Legumes shared 6,508 (114,289 genes)  
150 families (**Fig. S15**), while 8,347 (130,529 genes) and 7,117 (113,667 genes) families  
151 were shared with oilseeds and other distantly related species, respectively (**Fig. S16**  
152 and **S17**). Shared and unique gene families are shown in **Figs. S15-S17**.

153 The gene numbers of orthologous families were used to determine the family size  
154 by counting the incorporated *A. duranensis* genes for each cluster. We compared the  
155 *A. duranensis* gene family size relative to corresponding gene family size in other  
156 plant species examined. The number difference of the gene family size and gene copy  
157 number were calculated. Then, the median of the *A. duranensis* gene count was  
158 determined and a polynomial fit of these values was computed using locally-weighted  
159 polynomial regress using an R stats package ([http://stat.ethz.ch/R-manual/R-](http://stat.ethz.ch/R-manual/R-patched/library)  
160 [patched/library](http://stat.ethz.ch/R-manual/R-patched/library)). A comparison of *A. duranensis* gene family size relative to  
161 corresponding gene family size in soybean and *Medicago* was presented in **Table S14**,  
162 indicating that approximately 56% of families showed no change in size between *A.*  
163 *duranensis* and soybean, while 73% between *A. duranensis* and *Medicago*, suggesting

164 that expansion and contraction of *A. duranensis* gene families are different from other  
165 legumes.

166 Transcription factors (TFs) can regulate the expression of genes at the  
167 transcriptional level. For the identification of known TFs in *A. duranensis*, TFs from  
168 other species were retrieved from PlantTFDB (<http://planttfdb.cbi.pku.edu.cn/>)  
169 (**Dataset S5**). For *A. duranensis*, we utilized the predicted gene set against the  
170 PlantTFDB databases using BLASTP with an E-value cutoff of 1e-5. A total of 5,251  
171 TFs were identified in *A. duranensis*, consisting of 58 families, representing 10.43%  
172 of predicted protein-coding genes (**Dataset S5**). Particularly enriched are TF families  
173 such as B3, bHLH, C2H2, C3H, ERF, G2-like, HD-Zip, M-type, YB-related, TCP,  
174 Trihelix and WRKY.

#### 175 **2.4 Identification of non-coding RNAs**

176 Non-coding RNAs include highly abundant and functionally important RNAs. In this  
177 study non-coding RNA genes refer to four different types: transfer RNA (tRNA),  
178 ribosomal RNA (rRNA), microRNA (miRNA) as well as small nuclear RNAs  
179 (snRNAs). Non-coding RNAs were annotated by aligned our assembly to against the  
180 Rfam database (version 11.0)<sup>22</sup>. Three RNA prediction programs including tRNAscan-  
181 SE, RNAmmer and INFERNAL were used to predict the non-coding RNAs in *A.*  
182 *duranensis*. The tRNAs were predicted using the tRNAscan-SE<sup>23</sup>, rRNAs were  
183 identified using the RNAmmer<sup>24</sup>, snRNAs were annotated using the INFERNAL  
184 (version 1.0)<sup>25</sup> and other non-coding RNA genes were annotated by aligning the  
185 genome sequences against Rfam database (version 11.0). Conserved miRNAs were  
186 identified by mapping all entries in miRBase against the assembled genome. Novel  
187 miRNAs were identified using miREAP<sup>26</sup>.

188 In *A. duranensis*, we predicted a total of 913 tRNAs with an average length of  
189 ~73 bp; 115 rRNAs with an average length of ~1 kb, including 5S (61), 5.8S (17), 18S  
190 (21) and 28S (16) as well as 202 snRNAs with an average length of ~127 bp (**Table**

191 **S15).** A total of 816 miRNAs, including 801 conserved belonging to 96 families  
192 (**Tables S15-S16; Dataset S6**) i.e., more than soybean (390 genes, 85 families)  
193 *Medicago* (512 genes, 101 families) (miRBase release 21).

## 194 **2.5 Annotation of repetitive sequences and transposon elements**

195 We examined the genomic positions of the repeats that were classified as Long  
196 Terminal Repeats (LTR), Long Interspersed Nuclear Elements (LINE), Short  
197 Interspersed Nuclear Elements (SINE) and DNA transposons. Repetitive sequences in  
198 *A. duranensis* were identified using the RepeatMasker, Tandem Repeats Finder  
199 (TRF)<sup>27</sup> and RepeatModeler open-1.0<sup>28</sup> for homolog and *de novo* prediction,  
200 respectively. We screened the genome using RepeatMasker against the RepBase  
201 (version 20110920)<sup>29</sup>. The TE sequences were classified according to the unified  
202 classification system<sup>30</sup>. Gaps in the sequences were not included when calculating the  
203 total TE contents. A total of 20,597 scaffolds were subjected to the TE identification,  
204 90.2% (18,580) of which were identified as TE sequences. The remained scaffolds  
205 without TE could be low-copy sequences or contained uncharacterized repeat  
206 sequences so far. Approximately 60% of the *A. duranensis* genome were identified to  
207 be TE sequences (**Fig. 1** and **Table 2**).

## 208 **2.6 Dating the insertion time of LTR retrotransposons**

209 LTR retrotransposons are the most common type of TEs in plants and play a vital  
210 evolutionary role in the remarkable divergence of genome size in flowering plants<sup>31</sup>.  
211 The identity of both ends of LTR can be used to estimate their insertion time in  
212 genome<sup>32</sup>. We used CD-HIT program<sup>33</sup> to cluster LTR retrotransposons based on 90 %  
213 sequence similarity (-c 0.9). The longest sequence of each cluster was chosen as the  
214 representative sequence, and other sequences within the same cluster must cover 90%  
215 of the length of the representative sequence (-aL 0.9). Insertion dates were calculated  
216 using the Kimura two-parameter method<sup>34</sup> with the mutation rate of  $1.3 \times 10^{-8}$



217 substitutions per site per year<sup>35</sup>. The insertion times of LTR retrotransposons were  
218 dated to observe the activity of these elements in the *A. duranensis* genome expansion  
219 regarding the genome structural variations. The histograms, presented in **Fig. S24**,  
220 showed one peak of the insertion times of LTR retrotransposons, revealing these LTR  
221 retrotransposons have undergone one burst of amplification ~2 Mya, suggesting that  
222 the expansion of the *A. duranensis* genome was relatively recent.

223

### 224 **3. Molecular marker development**

#### 225 **3.1 Simple sequence repeats (SSRs)**

226 Simple Sequence Repeats (SSRs) in *A. duranensis* were identified using MISA, a  
227 MicroSATellite identification tool<sup>36</sup> (<http://pgrc.ipk-gatersleben.de/misa/>). SSRs with  
228 di-nucleotide motifs were defined with at least 6 repeats and 5 repeats for tri-, tetra-,  
229 penta- and hexa-nucleotide motifs. The maximum number of interrupting nucleotides  
230 in a compound SSR was set as 100. The statistics of SSRs (di- up to hexa-nucleotide)  
231 in the *A. duranensis* genome was shown in **Table S18**. In total, we detected 105,003  
232 SSRs in *A. duranensis* from which 84,464 SSR primers were designed. The di-  
233 nucleotide motif was the most abundant type and accounted for 43.45% of all SSRs,  
234 followed by tri-nucleotide (30.54%). In di-nucleotide type, AT motif was the most  
235 abundant type. In tri-nucleotide type, AAT was dominant (**Dataset S8**).

#### 236 **3.2 Single nucleotide polymorphism (SNPs)**

237 Reads from six re-sequenced genotypes including two A-genome genotypes (ICG  
238 8123 and ICG 8138) and four B-genome genotypes (ICG 8960, ICG 8209, ICG 13160  
239 and ICG 8206) (**Table S19**) were aligned to the reference genome using the Burrows-  
240 Wheeler Aligner program (BWA)<sup>37</sup>. About 70% of reads of A genomes (ICG 8123 and  
241 ICG 8138) could be mapped to the *A. duranensis* genome with a threshold that five  
242 mismatches are allowed, while ~45% of reads of B genomes (ICG 8960, ICG 8209,

243 ICG 13160 and ICG 8206) could be mapped (**Dataset S10**). SAMtools<sup>38</sup> (version 1.1)  
244 was used to call SNPs (**Table S20**). We identified 8,617,722-8,653,808 SNPs against  
245 A-genome genotypes and 3,684,730-3,884,005 against B-genome genotypes (**Table**  
246 **S20; Dataset S11**). Fewer SNPs were detected in B-genome genotypes due to fewer  
247 mapped reads. Structural variations such as insertions, deletions, copy number  
248 variations and inversions for the A- , B- and AB genomes were also identified (**Table**  
249 **S21**).  
250

#### 251 **4. Speciation of peanut A and B subgenome**

252 By performing a trio comparison of the synthetic tetraploid ISATGR 184 and its  
253 parents, ICG8123 and ICG8206, we studied the divergence between the subgenomes  
254 A and B. Parental reads were mapped to the reference genome and identified SNV  
255 between the two parental lines. In total, ~43% of reads from two parental lines were  
256 mapped to the reference genome. We filtered the SNPs by read coverage (>4x) and  
257 likelihood of second most likely genotype < 0.05. A total of 847676 high quality  
258 SNVs were identified between the two parental lines, meaning a mutation rates ~4.5 x  
259 10<sup>-4</sup> mutations at a base site in each line. Then, we mapped reads from ISATGR to the  
260 reference genome. In total, 76.04% of reads were successfully mapped. Genotypes are  
261 filtered by read coverage (>20x) and likelihood of second most likely genotype <  
262 0.05. We identified 748802 SNV sites between the two parental line and they were  
263 genotyped in the tetraploid species.  
264

#### 265 **5. Evolutionary analysis**

266 The phylogenetic tree was constructed using single-copy orthologous genes shared by  
267 *A. duranensis* and fifteen other plant species (soybean, *Medicago*, *Lotus*, pigeonpea,  
268 chickpea, common bean, canola, cotton, castor, linseed, *Arabidopsis*, apple, poplar,

269 tomato and rice) using the maximum-likelihood algorithm implemented in MEGA<sup>39</sup>.  
270 Colinear genes from *Medicago*<sup>40</sup>, soybean<sup>41</sup>, and grape<sup>42</sup> were used to locate related  
271 evolutionary events. We found evidence that peanut was affected by one lineage-  
272 specific event after its divergence from the *Medicago*-soybean lineage. Colinear genes  
273 within a genome and between different genomes were inferred by using MCScanX<sup>43</sup>.  
274 We adopted soybean genes' CDS in colinearity in its genome to search against peanut  
275 scaffold sequences to find best matching pairs of regions > 120 bp in length. Soybean  
276 genes were preferred over *Medicago* genes as reference to retrieve peanut homologs  
277 in that *Medicago* genes seem to accumulate mutations faster<sup>40</sup>. Genes with tandem  
278 duplicates in their respective neighboring 100 kb regions in soybean or from large  
279 gene families (with more than 30 genes at BLASTP E-value 1e-10) were removed  
280 from the present analysis. We inferred synonymous substitution rates between  
281 homologous genes by using the Nei-Gojobori approach implemented in PAML<sup>44</sup>.  
282 Peanut coding sequences were aligned with their soybean homologs codon by codon,  
283 estimating synonymous substitution rates ( $K_s$ ) between peanut and soybean homologs  
284 and between two retrieved peanut CDS. Accordingly,  $K_s$  between homologs within  
285 and among three other plants were estimated. The  $K_s$  distribution of peanut homologs  
286 shows a very prominent peak around  $K_s = 0.02-0.04$  (**Fig. 2d**), which suggests a  
287 peanut-specific polyploidization. Compared to a previously inferred soybean-specific  
288 polyploidization at ~13 Mya<sup>41</sup>, the peanut-specific event is much more recent,  
289 occurring ~5 Mya.

290 Reads from different genotypes were aligned to the reference genome by BWA<sup>37</sup>.  
291 SAMtools<sup>38</sup> (v1.1) were used to call single nucleotide variations (SNV). SNV sites  
292 were compared between parental lines and subgenomes in tetraploids to find likely  
293 converted sites and other mutated sites as previously described<sup>45</sup>. SNVs are identified  
294 between the two parental lines by mapping reads to the reference genome, with 72.0%  
295 and 43.1% of reads from ICG 8123 and ICG 8206 mapped respectively. We filtered  
296 SNVs by read coverage (>4x) and likelihood of second most likely genotype < 0.05. A

297 total of 847,676 high quality SNVs were identified between the two parental lines.  
298 About 76.04% of the reads from ISATGR 184 are mapped to the reference genome.  
299 Genotypes are filtered by read coverage (>20x) and likelihood of second most likely  
300 genotype < 0.05. A total of 748,802 SNV sites between the two parental lines were  
301 genotyped in the tetraploid species with high accuracy. We found that extensive gene  
302 conversion has taken place virtually immediately following polyploid formation, i.e.  
303 in the ~3 seed to seed generations that have passed following formation of this  
304 neopolyploid by human hands.

305

## 306 **6. Synteny analysis**

307 Promer package of MUMmer<sup>46</sup> was used to look for Maximal Unique Matches  
308 (MUMs) for the amino acid sequences aligned. The whole genome dot plots for these  
309 matches were depicted using the Mummerplot and gnuplot 4.4 patch level 2. The  
310 protein sequences of the genomes were compared and clustered using Vmatch<sup>47</sup> with  
311 a query and subject coverage of 85 % and 70 % respectively with a minimum match  
312 length of 100 and an exdrop of 100. Yn00 of PAML package was used for the  
313 identification of duplicated genes in the clusters. The matches were then further  
314 provided to i-ADHoRe<sup>48</sup> for the identification of syntenic blocks between two  
315 genomes. The coordinates of the first and last gene from these syntenic blocks were  
316 used for the construction of the Circos<sup>49</sup> image. The synonymous substitution rates  
317 between homologous genes were inferred using Nei Gojobori approach implemented  
318 in PAML<sup>44</sup>.

319

320

321

322

323 **7. Genes involved in subterranean fructification, oil biosynthesis and**  
324 **encoding allergens.**

325 **7.1 Genes involved in gravitropism and photomorphogenesis**

326 In order to identify the genes involved in gravitropism in *A. duranensis*, a total of 162  
327 genes falling into the GO category “gravitropism” (GO:0009630) and 36 genes  
328 identified in *Arabidopsis* were extracted from proteome of *Arabidopsis* and searched  
329 against the *A. duranensis* gene set using Blastp with an E-value cutoff of 1e-10. The  
330 Blastp hits are then filtered based on 80% query coverage. Of the 198 gravitropism  
331 related genes, 137 had homologs in *A. duranensis*. The unidentified gravitropism-  
332 related genes is likely due to absence or mis-annotation of the *A. duranensis* genome.  
333 Further analysis based on previous functional studies<sup>50-62</sup> identified 24 *A. duranensis*  
334 genes likely to be gravitropic including 4 involved in gravity perception, 8 in signal  
335 transduction and 12 in organ response (**Dataset S15**). To identify  
336 photomorphogenesis-related genes in *A. duranensis*, a total of 280 genes related to  
337 photomorphogenesis identified in *Arabidopsis* were found to have 137 *A. duranensis*  
338 homologs using Blastp with an E-value cutoff of 1e-10. The values of Ka and Ks and  
339 the  $\omega$  (Ka/Ks) were estimated between homologous genes using Nei-Gojobori  
340 approach implemented in PAML<sup>44</sup>.

341 **7.2 Genes involved in oil biosynthesis**

342 Genes involved in oil biosynthesis in *Arabidopsis*  
343 (<http://aralip.plantbiology.msu.edu/downloads>) were retrieved from *Arabidopsis*  
344 proteome and searched (BLASTP E-value 1e-5) against soybean and peanut  
345 proteomes, independently. The resulting hits obtained from soybean and peanut were  
346 then mapped back to the categories as in the aralip database to obtain numbers.

347

348

### 349 7.3 Allergen-encoding genes

350 To date, at least 11 potential allergen proteins (Ara h 1-11) have been officially  
351 recognized by the International Union of Immunological Societies (IUIS,  
352 <http://www.allergen.org/Allergen.aspx>, last accessed December 12, 2014). These  
353 proteins were downloaded from GenBank and subjected to BLASTp analysis against  
354 the *A. duranensis* gene set with an E-value cutoff of 1e-30. Of the 11 allergens, nine  
355 were found in *A. duranensis*. Of the remained two allergens, the Ara h 6 was  
356 identified with an E-value cutoff of 1e-20, the other one (Ara h 4) has been renamed  
357 as Ara h 3. All known peanut allergens were identified in *A. duranensis* with an E  
358 value cutoff of 1e-20. In order to identify novel allergen-encoding genes in *A.*  
359 *duranensis*, 61 allergen proteins from other crops, like wheat, soybean and tomato,  
360 were also downloaded from IUIS. We searched for *A. duranensis* genes orthologous to  
361 these allergen-encoding genes, and identified 21 putative orthologs including 13  
362 potential novel allergen-encoding genes as well as 7 orthologs of known peanut  
363 allergen genes (**Dataset S16**). For further annotation, these genes were subject to  
364 similarity search against the Pfam database (<http://pfam.xfam.org/> last accessed  
365 December 13, 2014) with an E-value cutoff of 1e-5. These allergen-encoding genes  
366 were classified in 14 Pfam families, of which four families contain at least two genes.  
367 It is worth to note that Ara h 8 has three paralogs in the *A. duranensis* genome, and the  
368 identity between the paralogs ranging from 92~94%.

369

370

371

## SI Tables:

**Table S1. Construction of libraries, generation and filtering of sequencing data used for genome assembly**

| Platform        | Library  | Read Count  | Average read length (bp) | Raw data (bp)  | Sequence depth |
|-----------------|----------|-------------|--------------------------|----------------|----------------|
| <b>Illumina</b> | 250 bp   | 138,068,824 | 125                      | 34,517,206,000 | 25.01          |
|                 | 500 bp   | 137,054,823 | 125                      | 34,263,705,750 | 24.83          |
|                 | 800 bp   | 115,096,083 | 125                      | 28,774,020,750 | 20.85          |
|                 | 2000 bp  | 71,225,552  | 125                      | 17,806,388,000 | 12.90          |
|                 | 5000 bp  | 91,106,606  | 125                      | 22,776,651,500 | 16.50          |
|                 | 10000 bp | 61,580,712  | 125                      | 15,395,178,000 | 11.16          |
|                 | 20000 bp | 305,601,609 | 125                      | 76,400,402,250 | 55.36          |

**Table S2. Summary of the *A. duranensis* genome assembly**

|                               | Contigs     |        | Scaffolds     |        |
|-------------------------------|-------------|--------|---------------|--------|
|                               | Size        | Number | Size          | Number |
| N90                           | 5,864       | 36,381 | 148,975       | 1,718  |
| N80                           | 11,725      | 24,839 | 264,326       | 1,197  |
| N70                           | 17,450      | 18,084 | 376,360       | 864    |
| N60                           | 23,279      | 13,268 | 500,641       | 619    |
| N50                           | 29,584      | 9,555  | 649,840       | 437    |
| Longest (bp)                  | 285,529     |        | 5,342,956     |        |
| Total size (bp)               | 972,902,491 |        | 1,051,523,805 |        |
| Total number ( $\geq 100$ bp) |             | 90,568 |               | 8,173  |
| Total number ( $\geq 1$ kb)   |             | 67,603 |               | 5,025  |
| Total number ( $\geq 2$ kb)   |             | 54,773 |               | 3,996  |



**Table S3. Distribution of contig and scaffold length for *A. duranensis* genome**

| Contig      |        |                     |                      |                | Scaffold |                     |                      |                |
|-------------|--------|---------------------|----------------------|----------------|----------|---------------------|----------------------|----------------|
| Length (kb) | Number | Average length (bp) | Subtotal length (Mb) | Percentage (%) | Number   | Average length (bp) | Subtotal length (Mb) | Percentage (%) |
| ≥100        | 387    | 125,938             | 48.74                | 5.01           | 2,084    | 475,715             | 991.4                | 94.28          |
| ≥50         | 3,552  | 72,807              | 258.6                | 26.58          | 2,544    | 403,017             | 1,025                | 97.50          |
| ≥30         | 9,339  | 51,402              | 480.0                | 49.34          | 2,799    | 369,896             | 1,035                | 98.46          |
| ≥20         | 15,749 | 40,468              | 637.3                | 65.51          | 3,003    | 346,451             | 1,040                | 98.94          |
| ≥10         | 27,471 | 29,373              | 806.9                | 82.94          | 3,356    | 311,461             | 1,045                | 99.40          |
| ≥2          | 54,773 | 17,190              | 941.6                | 96.78          | 3,996    | 262,271             | 1,048                | 99.67          |
| ≥1          | 67,619 | 14,197              | 959.9                | 98.67          | 5,027    | 208,754             | 1,049                | 99.80          |

**Table S4. Assessment of the assembled genome through PCR amplification**

| <b>Category</b>                           | <b>Fragment number</b> |
|-------------------------------------------|------------------------|
| Total primer pairs used                   | 411                    |
| Number of amplified primers               | 365                    |
| Number of non-amplified primers           | 46                     |
| Primers with single amplified fragment    | 264                    |
| Primers with multiple amplified fragments | 101                    |
| Primers with major amplified fragment     | 50                     |

**Table S5. Evaluation of completeness of the genome assembly using core eukaryotic gene mapping approach (CEGMA)**

| <b>Parameter</b>            |              | <b>Number</b> | <b>Percent (%)</b> |
|-----------------------------|--------------|---------------|--------------------|
| Total KOGs                  |              | 458           |                    |
| One KOG align one gene      |              | 410           | 89.52              |
| One KOG align one gene      | overlap>0.7  | 370           | 80.78              |
|                             | overlap >0.5 | 404           | 88.21              |
| One KOG align several genes |              | 31            | 6.76               |
| One KOG align no gene       |              | 17            | 3.71               |

**KOGs=Eukaryotic orthologous gene sequences**

**Table S6. Assessment of gene space captured in genome assembly using all libraries**

|                                   | <b>Illumina PE Reads</b> | <b>Illumia MP Reads</b> | <b>454 Reads</b> |
|-----------------------------------|--------------------------|-------------------------|------------------|
| Total Reads                       | 781,795,634.00           | 565,857,140             | 48,433,168       |
| Mapped reads                      | 688,385,989.00           | 480,729,955             | 47,943,412       |
| Mapping percentage (%)            | 88.05%                   | 84.97%                  | 98.99            |
| Genome coverage at $\geq 1x$ (%)  | 84.68%                   | 63.56%                  | 85.42            |
| Genome coverage at $\geq 2x$ (%)  | 83.00%                   | 60.55%                  | 83.76            |
| Genome coverage at $\geq 5x$ (%)  | 78.14%                   | 54.08                   | 77.65            |
| Genome coverage at $\geq 10x$ (%) | 70.34%                   | 44.485                  | 63.77            |
| Genome coverage at $\geq 15x$ (%) | 61.79%                   | 35.875                  | 47.16            |
| Bases not covered (bp)            | 326,410,883              | 775,155,378             | 157,073,491      |
| % of bases not covered            | 15.15                    | 33.98                   | 14.58            |
| Average depth                     | 31.97                    | 21.56                   | 22.87            |
| Total bases (bp)                  | 2,150,737,583            | 2,150,841,427           | 1,077,216,168    |

**Table S7. Estimation of *A. duranensis* genome using K-mer statistics**

| <b>K-mer value</b> | <b>K-mer number</b> | <b>Depth</b> | <b>Genome size (bp)</b> | <b>Used bases</b> | <b>Used reads</b> | <b>Depth (X)</b> | <b>Average read length (bp)</b> |
|--------------------|---------------------|--------------|-------------------------|-------------------|-------------------|------------------|---------------------------------|
| 25                 | 60,198,113,206      | 24           | 1,381,794,909           | 78,961,359,034    | 781,793,678       | 57.14            | 101                             |

**Table S8. Gene sets used in this study from different plant species**

| Species     | Database                  | Version                                                                       |
|-------------|---------------------------|-------------------------------------------------------------------------------|
| Soybean     | Phytozomev9.1             | JGI Glyma1.1 annotation of the chromosome-based Glyma1 assembly               |
| Medicago    | Phytozomev9.1             | Mt3.5v4 on assembly MedtrA17_3.5 from the Medicago Genome Sequence Consortium |
| Lotus       | kazusa.or.jp              | lotus_r2.5                                                                    |
| Common bean | Phytozomev9.1             | JGI annotation v1.0 on assembly v1.0 using published ESTs, and JGI RNAseq     |
| Chickpea    | Legume Information System | v1.0                                                                          |
| Pigeonpea   | Legume Information System | v1.0                                                                          |
| Canola      | Phytozomev9.1             | BrapaFPsc_277_v1.3                                                            |
| Cotton      | Phytozomev9.1             | JGI annotation v2.1 on assembly v2.0                                          |
| Castor      | Phytozomev9.1             | TIGR release 0.1                                                              |
| Linseed     | Phytozomev9.1             | Lusitatissimum_200_v1.0                                                       |
| Arabidopsis | Phytozomev9.1             | TAIR release 10 acquired from TAIR                                            |
| Apple       | Phytozomev9.1             | GDR prediction v1.0 on Malus x domestica assembly v1.0                        |
| Poplar      | Phytozomev9.1             | JGI assembly release v3.0, annotation v3.0                                    |
| Tomato      | Phytozomev9.1             | SGNTomato Genome Project ITAG2.3                                              |
| Rice        | Phytozomev9.1             | MSU Release 7.0 of the Rice Genome Annotation                                 |

**Table S9. The statistics of aligned genes between *A. duranensis* and other plant species with an E value cutoff of 1e-5.**

| Species                             | <i>A. duranensis</i> |            | Aligned species |            |
|-------------------------------------|----------------------|------------|-----------------|------------|
|                                     | Matched genes        | Percentage | Matched genes   | Percentage |
| <i>A. duranensis</i> vs Arabidopsis | 22132                | 43.98      | 13185           | 48.09      |
| <i>A. duranensis</i> vs Canola      | 23129                | 45.96      | 13973           | 34.51      |
| <i>A. duranensis</i> vs Chickpea    | 24496                | 48.68      | 14116           | 49.93      |
| <i>A. duranensis</i> vs Pigeonpea   | 31456                | 62.51      | 16570           | 34.04      |
| <i>A. duranensis</i> vs Soybean     | 26836                | 53.33      | 17445           | 31.13      |
| <i>A. duranensis</i> vs Cotton      | 22990                | 45.68      | 15733           | 41.95      |
| <i>A. duranensis</i> vs Lotus       | 27400                | 54.45      | 13079           | 33.99      |
| <i>A. duranensis</i> vs Linseed     | 21798                | 43.32      | 14082           | 32.39      |
| <i>A. duranensis</i> vs Apple       | 23827                | 47.35      | 14468           | 22.78      |
| <i>A. duranensis</i> vs Medicago    | 28831                | 57.29      | 16081           | 31.60      |
| <i>A. duranensis</i> vs Rice        | 22572                | 44.85      | 12224           | 30.07      |
| <i>A. duranensis</i> vs Poplar      | 23899                | 47.49      | 15840           | 38.32      |
| <i>A. duranensis</i> vs Common bean | 26978                | 53.61      | 15391           | 56.59      |
| <i>A. duranensis</i> vs Castor      | 25245                | 50.16      | 13689           | 43.85      |
| <i>A. duranensis</i> vs Tomato      | 23640                | 46.98      | 13205           | 38.03      |

**Table S10. General statistics of predicted protein-coding genes in *A. duranensis* and comparison with other plant species**

| Gene set         | Common name          | Number of genes | Average gene length (bp) | Average CDS length (bp) | Average exon per gene | Average intron length (bp) |
|------------------|----------------------|-----------------|--------------------------|-------------------------|-----------------------|----------------------------|
| <b>Reference</b> | <i>A. duranensis</i> | 50,324          | 3,057.92                 | 312.36                  | 3.37                  | 709.57                     |
|                  | Soybean              | 56,044          | 4,671.51                 | 214.91                  | 10.22                 | 486.85                     |
|                  | Medicago             | 50,894          | 3,064.99                 | 231.70                  | 5.87                  | 413.13                     |
|                  | Lotus                | 38,482          | 1,494.66                 | 258.73                  | 2.96                  | 447.89                     |
|                  | Common bean          | 27,197          | 4,048.62                 | 234.25                  | 6.85                  | 449.59                     |
|                  | Chickpea             | 28,269          | 3,055.39                 | 236.51                  | 4.93                  | 448.78                     |
|                  | Pigeonpea            | 48,680          | 2,348.70                 | 267.39                  | 3.59                  | 458.45                     |
|                  | Canola               | 40,492          | 2,274.32                 | 230.81                  | 5.63                  | 185.02                     |
| <b>Homology</b>  | Cotton               | 37,505          | 3,914.53                 | 203.66                  | 14.07                 | 333.79                     |
|                  | Castor               | 31,221          | 2,261.54                 | 242.46                  | 4.17                  | 339.80                     |
|                  | Linseed              | 43,471          | 2,307.97                 | 238.58                  | 5.03                  | 260.97                     |
|                  | Arabidopsis          | 27,416          | 2,335.51                 | 220.87                  | 7.57                  | 150.06                     |
|                  | Apple                | 63,514          | 2,639.37                 | 236.13                  | 4.74                  | 383.85                     |
|                  | Poplar               | 41,335          | 3,759.28                 | 211.44                  | 11.13                 | 359.97                     |
|                  | Tomato               | 34,727          | 3,163.56                 | 228.78                  | 4.62                  | 505.12                     |
|                  | Rice                 | 40,648          | 3,169.63                 | 240.49                  | 5.90                  | 370.11                     |

#Protein sequences from 15 sequenced plant species were used to perform gene prediction, taking one species each time. We mapped them to the genome assembly using TblastN (E-value- 1e-5). After this, homologous genome sequences were aligned against the matching proteins for accurate spliced alignments.



**Table S11. Functional annotation of predicted genes in *A. duranensis***

| <b>Database</b> | <b>Number</b> | <b>Percentage</b> |
|-----------------|---------------|-------------------|
| SWISS-PROT      | 20,701        | 41.13 %           |
| TrEMBL          | 35,365        | 70.27 %           |
| NR              | 35,726        | 70.99%            |
| NT              | 40,552        | 80.58%            |
| InterPro        | 30,032        | 59.68 %           |
| KEGG            | 30,573        | 60.75 %           |
| GO              | 24,498        | 48.68 %           |
| Pfam            | 25,771        | 51.21 %           |
| CDD             | 23,903        | 47.50 %           |
| Un-annotated    | 5,494         | 10.9%             |

**Table S12. Details on gene family for *A. duranensis* and other plant species**

| <b>Species</b>       | <b>Total predicted genes</b> | <b>Genes in orthologous groups</b> | <b>Genes not in orthologous groups<sup>1</sup></b> | <b>Total orthologous groups<sup>2</sup></b> | <b>Species-specific homolog groups<sup>3</sup></b> | <b>Average genes group</b> |
|----------------------|------------------------------|------------------------------------|----------------------------------------------------|---------------------------------------------|----------------------------------------------------|----------------------------|
| <i>A. duranensis</i> | 50,324                       | 40,736                             | 9,588                                              | 14,005                                      | 1,423 (16,472)                                     | 2.91                       |
| Chickpea             | 31,988                       | 30,412                             | 1,576                                              | 14,657                                      | 348 (1,375)                                        | 2.07                       |
| Pigeonpea            | 48,680                       | 42,353                             | 6,327                                              | 17,222                                      | 1,440 (7,934)                                      | 2.46                       |
| Soybean              | 73,320                       | 62,797                             | 10,523                                             | 17,900                                      | 1,265 (3,331)                                      | 3.51                       |
| Medicago             | 45,888                       | 32,786                             | 13,102                                             | 14,159                                      | 2,202 (9,533)                                      | 2.32                       |
| Lotus                | 42,399                       | 24,345                             | 18,054                                             | 14,599                                      | 1,155 (4,248)                                      | 1.67                       |
| Common bean          | 31,638                       | 29,666                             | 1,972                                              | 15,908                                      | 271 (801)                                          | 1.86                       |
| Linseed              | 43,484                       | 37,033                             | 6,451                                              | 14,258                                      | 1,474 (4,907)                                      | 2.60                       |
| Canola               | 101,040                      | 81,965                             | 19,075                                             | 21,752                                      | 5,582 (17,934)                                     | 3.77                       |
| Castor               | 31,221                       | 21,077                             | 10,144                                             | 15,360                                      | 604 (1,608)                                        | 1.37                       |
| Cotton               | 77,267                       | 71,534                             | 5,733                                              | 16,910                                      | 2,016 (6,652)                                      | 4.23                       |
| Rice                 | 49,061                       | 36,506                             | 12,555                                             | 13,995                                      | 2,900 (10,795)                                     | 2.61                       |
| Tomato               | 34,727                       | 26,231                             | 8,496                                              | 14,260                                      | 983 (3,873)                                        | 1.84                       |
| Apple                | 63,517                       | 48,160                             | 15,357                                             | 17,200                                      | 3,659 (11,308)                                     | 2.80                       |
| Arabidopsis          | 35,386                       | 31,882                             | 3,504                                              | 16,329                                      | 577 (1,550)                                        | 1.95                       |
| Poplar               | 73,013                       | 64,680                             | 8,333                                              | 16,465                                      | 1,475 (4,410)                                      | 3.93                       |

<sup>1</sup>Predicted genes that were not organized into groups using OrthoMCL. We suggest that many such genes are misannotated, though we cannot rule out genes with unique domain arrangements that have undergone lineage specific expansion. <sup>2</sup>Orthologous groups containing at least one gene from the indicated species. <sup>3</sup>Groups containing putative paralogs from the indicated species, but lacking genes from other species. Such unassigned homologous groups may contain genes with ambiguous relationships among species, such as many of the NBS-LRR disease resistance genes that can evolve by processes such as non-allelic recombination and gene conversion.

**Table S13. Comparison of *A. duranensis* gene families with soybean and *Medicago***

| Family size                                                                  | Difference in gene copy number |       |       |       |       |       |       |       |      |      |      |      |      |      |      |       |
|------------------------------------------------------------------------------|--------------------------------|-------|-------|-------|-------|-------|-------|-------|------|------|------|------|------|------|------|-------|
|                                                                              | <-6                            | -6    | -5    | -4    | -3    | -2    | -1    | 0     | 1    | 2    | 3    | 4    | 5    | 6    | >6   | Total |
| <b>Shared gene families between <i>A. duranensis</i> and Soybean</b>         |                                |       |       |       |       |       |       |       |      |      |      |      |      |      |      |       |
| 1                                                                            |                                |       |       |       |       |       |       | 94.66 | 4.49 | 0.31 | 0.08 | 0.08 | 0.02 | 0.36 | 0.34 | 6197  |
| 2                                                                            |                                |       |       |       |       |       | 85.43 | 12.9  | 1.07 | 0.25 | 0.13 | 0.03 | 0.03 | 0.09 | 0.06 | 3170  |
| 3                                                                            |                                |       |       |       |       | 67.87 | 25.11 | 5.48  | 0.88 | 0    | 0    | 0    | 0.11 | 0.22 | 0.22 | 912   |
| 4                                                                            |                                |       |       | 48.89 | 31.67 | 15.56 | 2.5   | 0     | 0    | 0    | 0    | 0    | 0    | 0.28 | 0.28 | 360   |
| 5                                                                            |                                |       | 34.01 | 34.52 | 19.29 | 6.09  | 2.54  | 0     | 0.51 | 0    | 0    | 0    | 0    | 0.51 | 0.51 | 197   |
| 6                                                                            |                                | 33.66 | 34.65 | 17.82 | 6.93  | 0.99  | 0     | 0     | 0    | 0    | 0    | 0    | 0    | 0    | 0    | 101   |
| 7                                                                            |                                | 8.57  | 31.43 | 25.71 | 11.43 | 10    | 2.86  | 0     | 0    | 0    | 0    | 0    | 0    | 0    | 0    | 70    |
| 8                                                                            | 19.35                          | 12.9  | 16.13 | 11.29 | 9.68  | 9.68  | 1.61  | 1.61  | 1.61 | 1.61 | 0    | 0    | 0    | 1.61 | 1.61 | 62    |
| 9                                                                            | 22.73                          | 25    | 13.64 | 6.82  | 6.82  | 2.27  | 2.27  | 0     | 0    | 0    | 0    | 0    | 0    | 0    | 0    | 44    |
| 10                                                                           | 33.33                          | 2.56  | 15.38 | 12.82 | 2.56  | 5.13  | 0     | 2.56  | 0    | 0    | 0    | 0    | 0    | 0    | 0    | 39    |
| <b>Shared gene families between <i>A. duranensis</i> and <i>Medicago</i></b> |                                |       |       |       |       |       |       |       |      |      |      |      |      |      |      |       |
| 1                                                                            |                                |       |       |       |       |       |       | 90.34 | 8.33 | 0.77 | 0.22 | 0.08 | 0    | 0.24 | 0.22 | 6325  |
| 2                                                                            |                                |       |       |       |       | 67.24 | 24.14 | 6.65  | 0.99 | 0.25 | 0    | 0    | 0    | 0.57 | 0.57 | 1218  |
| 3                                                                            |                                |       |       |       | 49.86 | 24.23 | 16.06 | 4.23  | 2.25 | 1.13 | 0.28 | 0.28 | 0.85 | 0.85 | 355  |       |
| 4                                                                            |                                |       |       | 30.67 | 28    | 20    | 10    | 4.67  | 1.33 | 1.33 | 0    | 0    | 1.33 | 1.33 | 150  |       |
| 5                                                                            |                                |       | 33.72 | 16.28 | 16.28 | 9.3   | 5.81  | 5.81  | 2.33 | 1.16 | 1.16 | 0    | 2.33 | 1.16 | 86   |       |
| 6                                                                            |                                | 26.79 | 16.07 | 17.86 | 10.71 | 8.93  | 3.57  | 1.79  | 3.57 | 0    | 0    | 0    | 0    | 0    | 56   |       |
| 7                                                                            |                                | 16.67 | 9.52  | 7.14  | 9.52  | 11.9  | 11.9  | 9.52  | 4.76 | 2.38 | 0    | 0    | 0    | 0    | 42   |       |
| 8                                                                            | 16.67                          | 23.33 | 6.67  | 3.33  | 6.67  | 6.67  | 0     | 3.33  | 0    | 0    | 3.33 | 0    | 0    | 3.33 | 3.33 | 30    |
| 9                                                                            | 37.04                          | 3.7   | 7.41  | 3.7   | 0     | 3.7   | 3.7   | 3.7   | 0    | 0    | 3.7  | 0    | 0    | 0    | 0    | 27    |
| 10                                                                           | 25                             | 3.57  | 3.57  | 7.14  | 0     | 3.57  | 3.57  | 3.57  | 7.14 | 0    | 3.57 | 3.57 | 0    | 0    | 0    | 28    |

**Table S14. Details on single copy orthologs and unique paralogs in *A. duranensis* and other plant species**

| <b>Species</b>       | <b>Single-copy orthologs</b> | <b>Co-orthologs<sup>1</sup></b> | <b>Unique paralogs</b> | <b>Other orthologs<sup>2</sup></b> | <b>Unclustered genes</b> |
|----------------------|------------------------------|---------------------------------|------------------------|------------------------------------|--------------------------|
| <i>A. duranensis</i> | 9,968                        | 7,138                           | 16,472                 | 7,158                              | 9,588                    |
| Chickpea             | 8,346                        | 12,125                          | 1,375                  | 8,566                              | 1,576                    |
| Pigeonpea            | 11,022                       | 11,201                          | 7,934                  | 12,196                             | 6,327                    |
| Soybean              | 3,779                        | 25,189                          | 3,331                  | 30,498                             | 10,523                   |
| Medicago             | 7,929                        | 9,403                           | 9,533                  | 5,921                              | 13,102                   |
| Lotus                | 10,120                       | 7,931                           | 4,248                  | 2,046                              | 18,054                   |
| Common bean          | 9,791                        | 11,609                          | 801                    | 7,465                              | 1,972                    |
| Linseed              | 2,895                        | 14,369                          | 4,907                  | 14,862                             | 6,451                    |
| Canola               | 1,531                        | 25,579                          | 17,934                 | 36,921                             | 19,075                   |
| Castor               | 12,258                       | 7,400                           | 1,608                  | 189                                | 10,144                   |
| Cotton               | 4,808                        | 29,975                          | 6,652                  | 30,099                             | 5,733                    |
| Rice                 | 5,654                        | 12,793                          | 10,795                 | 7,264                              | 12,555                   |
| Tomato               | 9,247                        | 9,151                           | 3,873                  | 3,960                              | 8,496                    |
| Apple                | 4,710                        | 15,529                          | 11,308                 | 16,613                             | 15,357                   |
| Arabidopsis          | 9,293                        | 11,947                          | 1,550                  | 9,092                              | 3,504                    |
| Poplar               | 3,674                        | 26,347                          | 4,410                  | 30,249                             | 8,333                    |

<sup>1</sup>Co-orthologous genes, also known as “in-paralogs”, are derived from duplication in the indicated genome. <sup>2</sup>Other orthologs represent gene duplication events internal to the overall set, but basal more than two of the compared species.

**Table S15. Summary of predicted non-protein coding genes in *A. duranensis* genome**

| Type  | Sub-type       | Number | Average length (bp) | Total length (bp) | Percent (%) |
|-------|----------------|--------|---------------------|-------------------|-------------|
| miRNA |                | 816    | 107.34              | 87,598            | 0.0063      |
| tRNA  |                | 913    | 73.28               | 66,904            | 0.0048      |
| rRNA  | 5S rRNA        | 61     | 116.59              | 7,112             | 0.0005      |
|       | 5.8S rRNA      | 17     | 152.94              | 2,600             | 0.0002      |
|       | 18S rRNA       | 21     | 1944.67             | 40,838            | 0.0029      |
|       | 28S rRNA       | 16     | 4579.94             | 73,279            | 0.0053      |
|       | Total rRNA     | 115    | 1076.77             | 123,829           | 0.0089      |
| snRNA | CD- box snRNA  | 71     | 106.73              | 7,578             | 0.0005      |
|       | Splicing snRNA | 131    | 137.85              | 18,058            | 0.0013      |
|       | Total snRNA    | 202    | 126.91              | 25,636            | 0.0018      |

**Table S16. New miRNAs identified in the *A. duranensis* genome**

| <b>ID</b>       | <b>Sequence</b>         | <b>Length</b> | <b>Scaffold</b> | <b>Start</b> | <b>End</b> | <b>Strand</b> |
|-----------------|-------------------------|---------------|-----------------|--------------|------------|---------------|
| Peanut_m0002-3p | ATAACCAAGGAAAAGACATT    | 20            | scaffold1297    | 106541       | 106560     | -             |
| Peanut_m0003-3p | ACTTAGGCCTTAGAACTTAT    | 20            | scaffold18250   | 900          | 919        | +             |
| Peanut_m0004-3p | ACATTAAACATGGGACAATTTA  | 22            | scaffold1988    | 30519        | 30540      | +             |
| Peanut_m0007-3p | TGAGATATCTCTTCCAGAAG    | 20            | scaffold371     | 58057        | 58076      | -             |
| Peanut_m0009-3p | GACTGTAGAGTGGTAATTCAA   | 21            | scaffold426     | 160999       | 161019     | -             |
| Peanut_m0014-3p | ACAGCCATTTTTGCCGAGTT    | 20            | scaffold918     | 204369       | 204388     | -             |
| Peanut_m0001-5p | CAGGAGACCCGGGTTCGATTCCC | 23            | scaffold1221    | 110014       | 110036     | +             |
| Peanut_m0005-5p | CTTTAGGTCAATGATTGGTA    | 20            | scaffold2433    | 93926        | 93945      | -             |
| Peanut_m0006-5p | AGTTCTGAGAAGTCTTCTTTG   | 21            | scaffold3536    | 27272        | 27292      | -             |
| Peanut_m0008-5p | AGAAGAACTTGTAGGTGTTGAA  | 22            | scaffold4210    | 29738        | 29759      | -             |
| Peanut_m0010-5p | GAGGAGACAGAAACAGGTAG    | 20            | scaffold454     | 183899       | 183918     | -             |
| Peanut_m0011-5p | TGACTTTTGGAAAATGTTTG    | 20            | scaffold495     | 204813       | 204832     | +             |
| Peanut_m0012-5p | TTCTGACTTCTTTAGGCAGT    | 20            | scaffold6457    | 39441        | 39460      | +             |
| Peanut_m0013-5p | TCTCTGCAGAAGGAATGACA    | 20            | scaffold681     | 121285       | 121304     | -             |
| Peanut_m0015-5p | GTGCAGGACGATGTCGTTGC    | 20            | scaffold9422    | 15413        | 15432      | +             |

**Table S17. Target genes and their function annotation of new miRNAs in *A. duranensis***

| <b>miRNA ID</b> | <b>Number of target genes</b> | <b>CDD (Conserved Domains Database)</b> | <b>Putative functions of target genes</b>                  |
|-----------------|-------------------------------|-----------------------------------------|------------------------------------------------------------|
| m0001-5p        | 3                             | COG1691                                 | NCAIR mutase (PurE)-related proteins                       |
|                 |                               | PLN03195                                | fatty acid omega-hydroxylase                               |
|                 |                               | TIGR03225                               | benzoyl-CoA oxygenase, B subunit                           |
| m0002-3p        | 17                            | cd00303                                 | Retropepsins                                               |
|                 |                               | cd11236                                 | MET-like receptor tyrosine kinases                         |
|                 |                               | COG3083                                 | Predicted hydrolase of alkaline phosphatase superfamily    |
|                 |                               | COG4036                                 | Predicted membrane protein                                 |
|                 |                               | COG5222                                 | Uncharacterized conserved protein, contains RING Zn-finger |
|                 |                               | pfam04900                               | Fcf1                                                       |
|                 |                               | PRK00232                                | 4-hydroxythreonine-4-phosphate dehydrogenase               |
|                 |                               | PRK06599                                | DNA topoisomerase I                                        |
|                 |                               | PRK08377                                | NADH dehydrogenase subunit N                               |
|                 |                               | PRK09330                                | cell division protein FtsZ                                 |
|                 |                               | PRK09629                                | bifunctional thiosulfate sulfurtransferase                 |
|                 |                               | PRK12679                                | transcriptional regulator Cbl                              |
|                 |                               | PRK13902                                | alanyl-tRNA synthetase                                     |
|                 |                               | TIGR04055                               | putative heme d1 biosynthesis radical SAM protein NirJ2    |
| m0003-3p        | 1                             | TIGR01160                               | translation initiation factor SUI1, eukaryotic             |
| m0004-3p        | 1                             | COG0061                                 | NAD kinase                                                 |
| m0005-5p        | 1                             | PLN02393                                | leucoanthocyanidin dioxygenase like protein                |
| m0006-5p        | 6                             | pfam09773                               | Meckelin (Transmembrane protein 67)                        |

|          |   |            |                                                            |
|----------|---|------------|------------------------------------------------------------|
|          |   | pfam13639  | Ring finger domain                                         |
|          |   | PRK13897   | type IV secretion system component VirD4                   |
|          |   | PTZ00350   | adenylosuccinate synthetase                                |
|          |   | smart00220 | Serine/Threonine protein kinases, catalytic domain         |
| m0007-3p | 1 | pfam03124  | EXS family                                                 |
| m0008-5p | 9 | cd00180    | Catalytic domain of Protein Kinases                        |
|          |   | pfam05133  | Phage portal protein, SPP1 Gp6-like                        |
|          |   | pfam05297  | Herpesvirus latent membrane protein 1 (LMP1)               |
|          |   | pfam06291  | Bor protein                                                |
|          |   | PLN02499   | glycerol-3-phosphate acyltransferase                       |
|          |   | PRK04028   | glutamyl-tRNA(Gln) amidotransferase subunit E              |
|          |   | PTZ00479   | RAP Superfamily                                            |
|          |   | TIGR02168  | chromosome segregation protein SMC, common bacterial type  |
|          |   | TIGR03981  | His-Xaa-Ser system putative quinone modification maturase  |
| m0010-5p | 1 | PLN02311   | chalcone isomerase                                         |
| m0011-5p | 6 | cd01851    | Guanylate-binding protein (GBP) family (N-terminal domain) |
|          |   | cd08866    | Ligand-binding SRPBCC domain                               |
|          |   | pfam00587  | tRNA synthetase class II core domain (G, H, P, S and T)    |
|          |   | PHA02746   | protein tyrosine phosphatase                               |
|          |   | PLN03240   | putative Low-temperature-induced protein                   |
| m0013-5p | 2 | pfam05699  | hAT family dimerisation domain                             |
|          |   | TIGR02169  | chromosome segregation protein SMC                         |
| m0015-5p | 1 | COG1752    | Predicted esterase of the alpha-beta hydrolase superfamily |



**Table S18. Summary of simple sequence repeats in *A. duranensis* regarding their distribution and primer design for peanut genetics and breeding applications.**

| <b>SSR Statistics</b>                                | <b>Numbers</b> |
|------------------------------------------------------|----------------|
| Total number of sequences examined                   | 20,597         |
| Total size of examined sequences (bp)                | 1,077,216,168  |
| Total number of identified SSRs                      | 105,003        |
| Number of SSR containing sequences                   | 15,209         |
| Number of sequences containing more than 1 SSR       | 12,308         |
| Number of SSRs present in compound formation         | 25,672         |
| <b>Distribution to different repeat type classes</b> |                |
| Number of di-nucleotide repeats                      | 45,622         |
| Number of tri-nucleotide repeats                     | 32,070         |
| Number of tetra-nucleotide repeats                   | 3,966          |
| Number of penta-nucleotide repeats                   | 1,450          |
| Number of hexa-nucleotide repeats                    | 428            |
| Number of compound repeats                           | 21,467         |
| <b>Primer pairs for SSRs</b>                         |                |
| Scaffolds were used to design primer pairs           | 11,712         |
| Total numbers of primer pairs designed               | 84,464         |

**Table S19. Details on re-sequencing data of ten genotypes including four synthetic tetraploids and six diploids**

| <b>Germplasm</b> | <b>Ploidy (genome)</b>    | <b>Parental combinations</b>                                         | <b>Read type</b> | <b>Number of reads</b> | <b>Read length (bp)</b> | <b>Data size (bp)</b> |
|------------------|---------------------------|----------------------------------------------------------------------|------------------|------------------------|-------------------------|-----------------------|
| ISATGR_5         | Synthetic tetraploid (BB) | [ <i>A. magna</i> (ICG 8960) x <i>A. batizocoi</i> (ICG 8209)]       | Paired end       | 983,446,602            | 101                     | 99,328,106,802        |
| ISATGR_278-18    | Synthetic tetraploid (AB) | [ <i>A. duranensis</i> (ICG 8138) x <i>A. batizocoi</i> (ICG 13160)] | Paired end       | 1,230,617,008          | 101                     | 124,292,317,808       |
| ISATGR_1212      | Synthetic tetraploid (AB) | [ <i>A. duranensis</i> (ICG 8123) x <i>A. ipaensis</i> (ICG 8206)]   | Paired end       | 914,091,908            | 101                     | 92,323,282,708        |
| ISATGR_184       | Synthetic tetraploid (AB) | [ <i>A. ipaensis</i> (ICG 8206) x <i>A. duranensis</i> (ICG 8123)]   | Paired end       | 1,258,898,410          | 101                     | 127,148,739,410       |
| ICG_8123         | Diploid (A)               | <i>A. duranensis</i>                                                 | Paired end       | 504,473,764            | 101                     | 50,951,850,164        |
| ICG_8138         | Diploid (A)               | <i>A. duranensis</i>                                                 | Paired end       | 503,836,436            | 101                     | 50,887,480,036        |
| ICG_8960         | Diploid (B)               | <i>A. magna</i>                                                      | Paired end       | 461,986,170            | 101                     | 46,660,603,170        |
| ICG_8209         | Diploid (B)               | <i>A. batizocoi</i>                                                  | Paired end       | 458,037,642            | 101                     | 46,261,801,842        |
| ICG_13160        | Diploid (B)               | <i>A. batizocoi</i>                                                  | Paired end       | 487,100,820            | 101                     | 49,197,182,820        |
| ICG_8206         | Diploid (B)               | <i>A. ipaensis</i>                                                   | Paired end       | 553,199,484            | 101                     | 55,873,147,884        |

**Table S20: Distribution of SNPs identified among the A genomes (two genotypes) and B genomes (four genotypes)**

|                    | <u>ICG 8123</u> |        | <u>ICG 8138</u> |        | <u>ICG 8960</u> |        | <u>ICG 8209</u> |        | <u>ICG 13160</u> |        | <u>ICG 8206</u> |        |
|--------------------|-----------------|--------|-----------------|--------|-----------------|--------|-----------------|--------|------------------|--------|-----------------|--------|
|                    | SNP             | Rate   | SNP             | Rate   | SNP             | Rate   | SNP             | Rate   | SNP              | Rate   | SNP             | Rate   |
| <b>Gene region</b> | 1,437,202       | 16.677 | 1,438,084       | 16.618 | 1,243,501       | 33.479 | 1,280,304       | 32.964 | 1,262,785        | 34.271 | 1,274,376       | 32.868 |
| <b>Exon</b>        | 453,740         | 5.265  | 450,314         | 5.204  | 423,103         | 11.391 | 429,687         | 11.063 | 428,290          | 11.623 | 436,853         | 11.267 |
| <b>Intron</b>      | 968,333         | 11.237 | 972,585         | 11.239 | 807,968         | 21.753 | 838,142         | 21.579 | 822,277          | 22.316 | 824,558         | 21.266 |
| <b>Others</b>      | 15,129          | 0.176  | 15,185          | 0.175  | 12,430          | 0.335  | 12,475          | 0.321  | 12,218           | 0.332  | 12,965          | 0.334  |
| <b>ncRNA</b>       | 1,567           | 0.018  | 1,311           | 0.015  | 849             | 0.023  | 896             | 0.023  | 885              | 0.024  | 771             | 0.02   |
| <b>tRNA</b>        | 253             | 0.003  | 229             | 0.003  | 71              | 0.002  | 67              | 0.002  | 81               | 0.002  | 55              | 0.001  |
| <b>rRNA</b>        | 407             | 0.005  | 202             | 0.002  | 110             | 0.003  | 125             | 0.003  | 131              | 0.004  | 101             | 0.003  |
| <b>snRNA</b>       | 248             | 0.003  | 240             | 0.003  | 153             | 0.004  | 190             | 0.005  | 186              | 0.005  | 146             | 0.004  |
| <b>miRNA</b>       | 659             | 0.008  | 640             | 0.007  | 515             | 0.014  | 514             | 0.013  | 487              | 0.013  | 469             | 0.012  |
| <b>TEs</b>         | 792,959         | 9.201  | 790,347         | 9.133  | 219,683         | 5.915  | 217,558         | 5.601  | 203,212          | 5.515  | 230,178         | 5.937  |
| <b>Others</b>      | 6,385,994       | 74.103 | 6,424,066       | 74.234 | 2,250,204       | 60.583 | 2,385,247       | 61.412 | 2,217,848        | 60.19  | 2,371,974       | 61.176 |
| <b>Total</b>       | 8,617,722       | 100    | 8,653,808       | 100    | 3,714,237       | 100    | 3,884,005       | 100    | 3,684,730        | 100    | 3,877,299       | 100    |

**Table S21: Summary of structural variations in diploid (A-genome and B-genome) and synthetic (AB-genome) genotypes**

|                         | No. of SVs                        |               | Total length (kb) | Average length (bp) |
|-------------------------|-----------------------------------|---------------|-------------------|---------------------|
| <b>Diploid A genome</b> |                                   |               |                   |                     |
| <b>Sample</b>           | <b>PI 475845-reference genome</b> |               |                   |                     |
| Insertion               | 0                                 |               | 0                 | 0                   |
| Deletion                | 33,648                            |               | 116,094.635       | 3,450.269           |
| Inversion               | 3,003                             |               | 55,763.004        | 18,569.099          |
| CNVs                    | 15,958                            | gain : 4,243  | -                 | -                   |
|                         |                                   | loss : 11,715 |                   |                     |
| <b>Sample</b>           | <b>ICG 8138</b>                   |               |                   |                     |
| Insertion               | 0                                 |               | 0                 | 0                   |
| Deletion                | 23,077                            |               | 122,149.219       | 5,293.115           |
| Inversion               | 2,234                             |               | 46,606.732        | 20,862.458          |
| CNVs                    | 20,776                            | gain : 11,858 | -                 | -                   |
|                         |                                   | loss : 8,918  |                   |                     |
| <b>Sample</b>           | <b>ICG 8123</b>                   |               |                   |                     |
| Insertion               | 0                                 |               | 0                 | 0                   |
| Deletion                | 22,600                            |               | 119,789.414       | 5,300.417           |
| Inversion               | 2,084                             |               | 43,681.400        | 20,960.365          |
| CNVs                    | 20,955                            | gain : 12,369 | -                 | -                   |
|                         |                                   | loss : 8,586  |                   |                     |
| <b>Diploid A genome</b> |                                   |               |                   |                     |

| <b>Sample</b> | <b>ICG 8960</b>  |               |            |
|---------------|------------------|---------------|------------|
| Insertion     | 0                |               | 0          |
| Deletion      | 8,946            |               | 60,149.980 |
| Inversion     | 1,378            |               | 32,379.408 |
| CNVs          | 24,132           | gain : 13,288 | -          |
|               |                  | loss : 10,844 |            |
| <b>Sample</b> | <b>ICG 8209</b>  |               |            |
| Insertion     | 0                |               | 0          |
| Deletion      | 9,723            |               | 61,424.708 |
| Inversion     | 1,417            |               | 29,805.699 |
| CNVs          | 24,146           | gain : 10,729 | -          |
|               |                  | loss : 13,417 |            |
| <b>Sample</b> | <b>ICG 13160</b> |               |            |
| Insertion     | 0                |               | 0          |
| Deletion      | 10,344           |               | 61,214.867 |
| Inversion     | 1,396            |               | 32,590.761 |
| CNVs          | 24,188           | gain : 9,559  | -          |
|               |                  | loss : 14,629 |            |
| <b>Sample</b> | <b>ICG 8206</b>  |               |            |
| Insertion     | 0                |               | 0          |
| Deletion      | 9,801            |               | 64,806.025 |
| Inversion     | 1,488            |               | 36,921.970 |
| CNVs          | 24,092           | gain : 11,957 | -          |
|               |                  | loss : 12,135 |            |

| <b>Synthetic genotypes</b> |                      |                                |            |
|----------------------------|----------------------|--------------------------------|------------|
| <b>Sample</b>              | <b>ISATGR-5</b>      |                                |            |
| Insertion                  | 0                    | 0                              | 0          |
| Deletion                   | 15,149               | 87,538.429                     | 5,778.496  |
| Inversion                  | 2,380                | 53,421.757                     | 22,446.116 |
| CNVs                       | 24,434               | gain : 18,733<br>loss : 5,701  | -          |
| <b>Sample</b>              | <b>ISATGR 278-18</b> |                                |            |
| Insertion                  | 0                    | 0                              | 0          |
| Deletion                   | 29,842               | 158,257.555                    | 5,303.182  |
| Inversion                  | 3,662                | 76,232.457                     | 20,817.165 |
| CNVs                       | 20,913               | gain : 13,367,<br>loss : 7,546 | -          |
| <b>Sample</b>              | <b>ISATGR 1212</b>   |                                |            |
| Insertion                  | 0                    | 0                              | 0          |
| Deletion                   | 24,747               | 135,350.592                    | 5,469.374  |
| Inversion                  | 3,184                | 68,492.371                     | 21,511.423 |
| CNVs                       | 20,939               | gain : 13,219<br>loss : 7,720  | -          |
| <b>Sample</b>              | <b>ISATGR 184</b>    |                                |            |
| Insertion                  | 1                    | 0.217                          | 217        |
| Deletion                   | 31,651               | 168,895.231                    | 5,336.174  |
| Inversion                  | 3,802                | 79,680.365                     | 20,957.487 |
| CNVs                       | 20,601               | gain : 12,384                  | -          |

**Table S22. Summary of putative acyl lipid genes in *A. duranensis*, *Arabidopsis* and soybean**

| <b>Category of lipid genes</b>                                 | <b><i>A. duranensis</i></b> | <b><i>Arabidopsis</i></b> | <b>Soybean</b> |
|----------------------------------------------------------------|-----------------------------|---------------------------|----------------|
| Phospholipase                                                  | 115                         | 90                        | 120            |
| Miscellaneous lipid synthesis related                          | 92                          | 73                        | 93             |
| Sphingolipid synthesis                                         | 40                          | 28                        | 40             |
| Phospholipid synthesis in mitochondria                         | 16                          | 10                        | 16             |
| Fatty acid synthesis in plastids                               | 73                          | 48                        | 72             |
| Aromatic suberin synthesis                                     | 14                          | 8                         | 14             |
| Lipid signaling                                                | 187                         | 142                       | 191            |
| Aliphatic suberin synthesis                                    | 42                          | 34                        | 42             |
| Eukaryotic phospholipid synthesis                              | 75                          | 45                        | 75             |
| Lipase                                                         | 330                         | 269                       | 336            |
| Lipid trafficking                                              | 10                          | 6                         | 10             |
| Cuticular wax synthesis                                        | 191                         | 167                       | 200            |
| Mitochondrial fatty and lipoic acid synthesis                  | 22                          | 13                        | 22             |
| TAG degradation                                                | 47                          | 35                        | 47             |
| TAG synthesis                                                  | 96                          | 68                        | 96             |
| Fatty acid elongation and cuticular wax synthesis              | 30                          | 26                        | 30             |
| GDSL                                                           | 127                         | 106                       | 127            |
| Beta-oxidation                                                 | 35                          | 25                        | 35             |
| Lipid acylhydrolase                                            | 15                          | 11                        | 15             |
| Galactolipid degradation                                       | 10                          | 7                         | 10             |
| Cutin synthesis                                                | 31                          | 28                        | 31             |
| Plastidial glycerolipid, galactolipid and sulfolipid synthesis | 73                          | 52                        | 73             |
| Total                                                          | 1671                        | 1291                      | 1695           |

**Table S23. Summary of samples collected during seed development in peanut**

| <b>Stages</b> | <b>Samples</b> | <b>Seed size (mm)</b> |
|---------------|----------------|-----------------------|
| P5            | Seed           | 1.0 – 2.0             |
| P6            | Seed           | 2.0 – 4.0             |
| P7            | Seed           | 4.0 – 6.0             |
| P8            | Seed           | 6.0 – 8.0             |
| P9            | Seed           | 8.0 – 10.0            |
| P10           | Seed           | 10.0 – 12.0           |



## SI Figures:

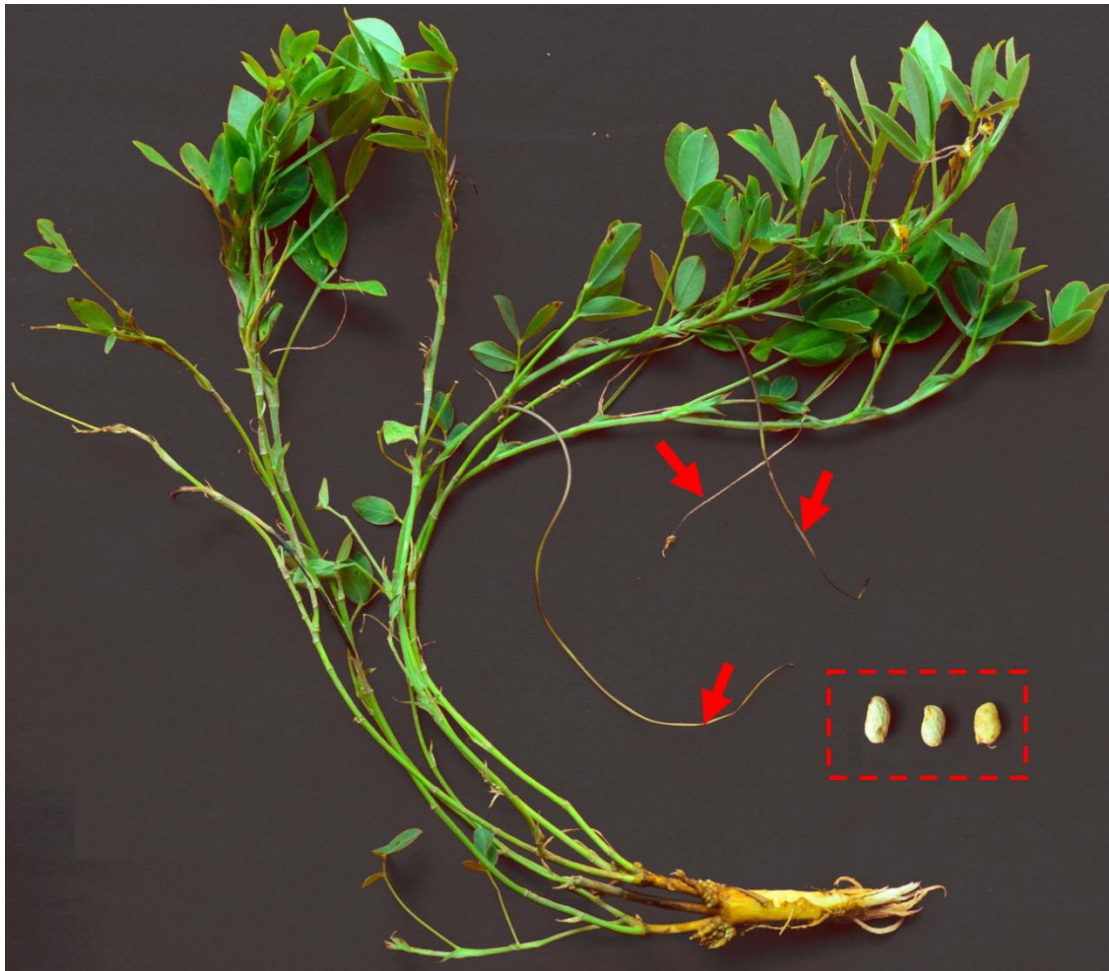

**Figure S1.** *A. duranensis* accessions PI475845 (reference genome). The red arrows show the aerially developing pegs, and the red dash box shows the pods developed underground. Aerially pegs do not normally expand until penetration into the soil. This accession was collected from Tariji Bolivia (Latitude: 21.53, Longitude: 63.38) in 1977 by collectors GKBSPPSc (Gregory, W.C.; Krapovickas, A.; Banks, D.J.; Simpson, C.E.; Pietrarelli, J.; and Schinini, A.) (Stalker et al., 1995).

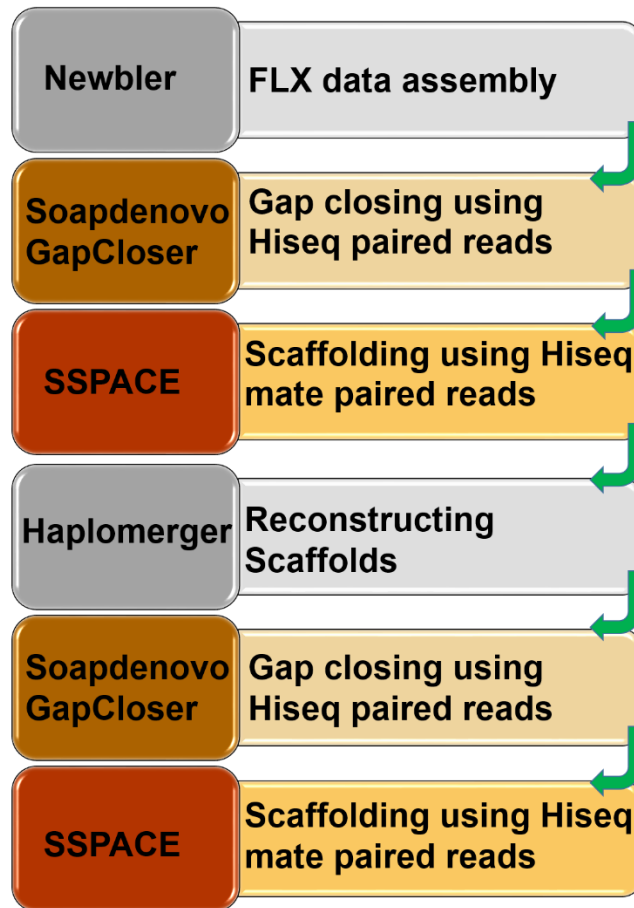

Figure S2. Flowchart of the approaches used for *de novo* assembly

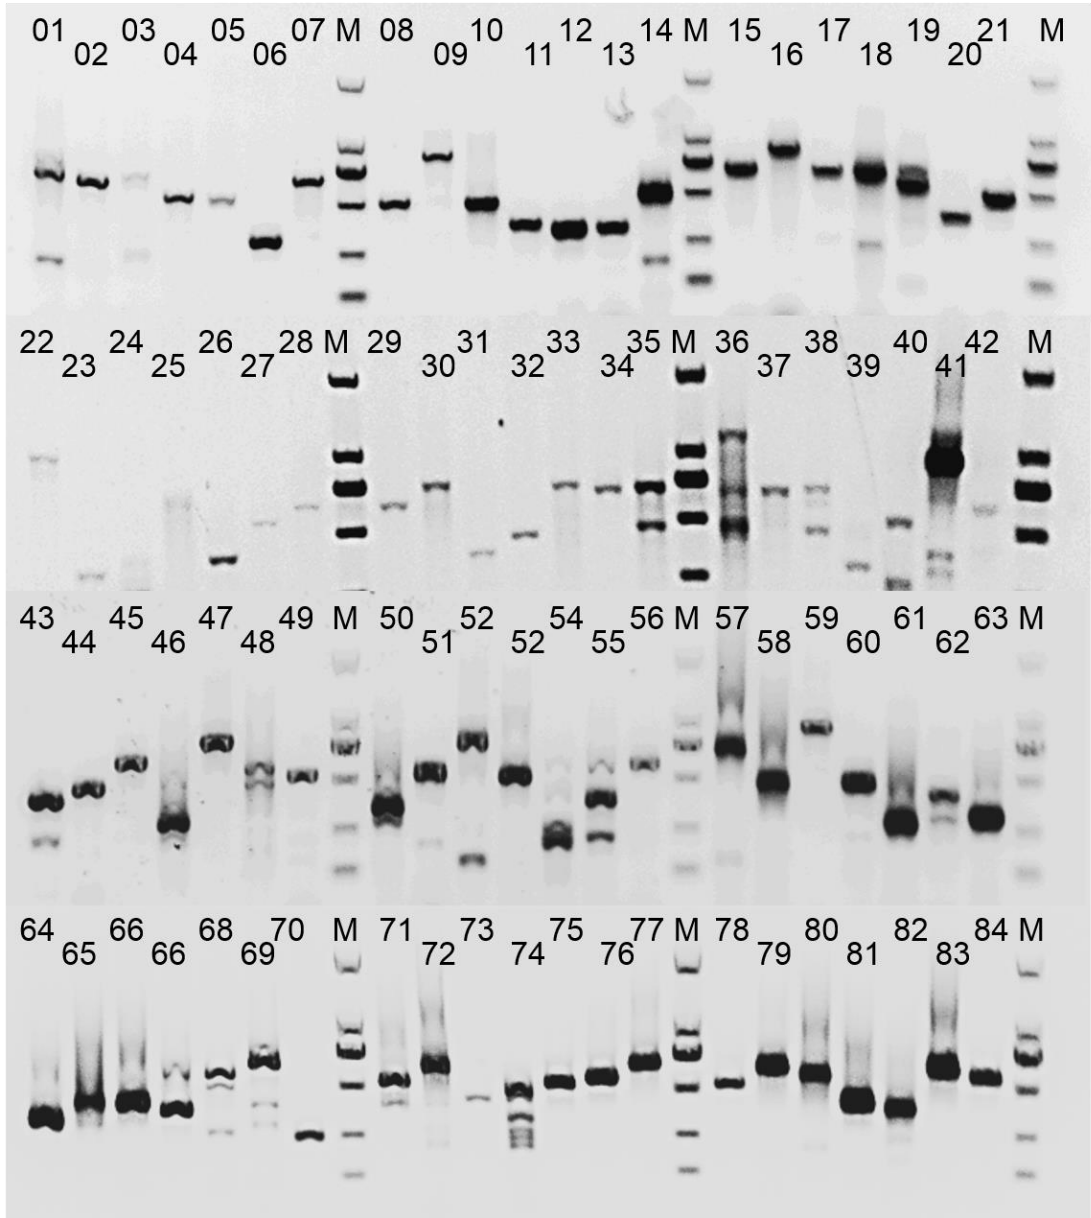

**Figure S3. Evaluation of the *A. duranensis* assembled genome using PCR amplification**

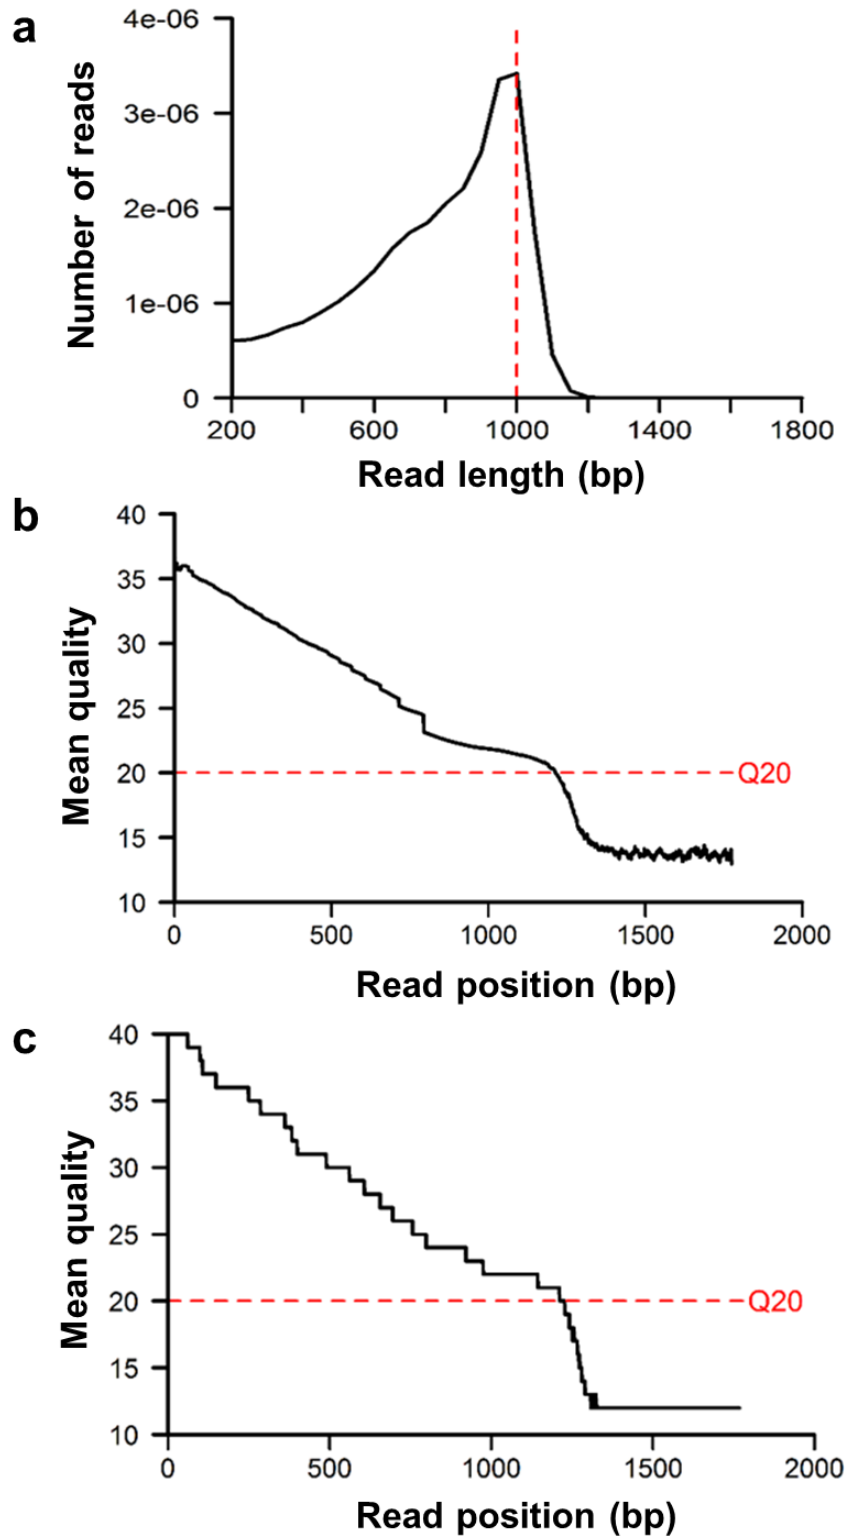

**Figure S4. Quality assessment of the sequencing data.**

The distributions were computed using FastQC (a) read length distribution, (b) mean read quality per read position, (c) median read quality per read position.

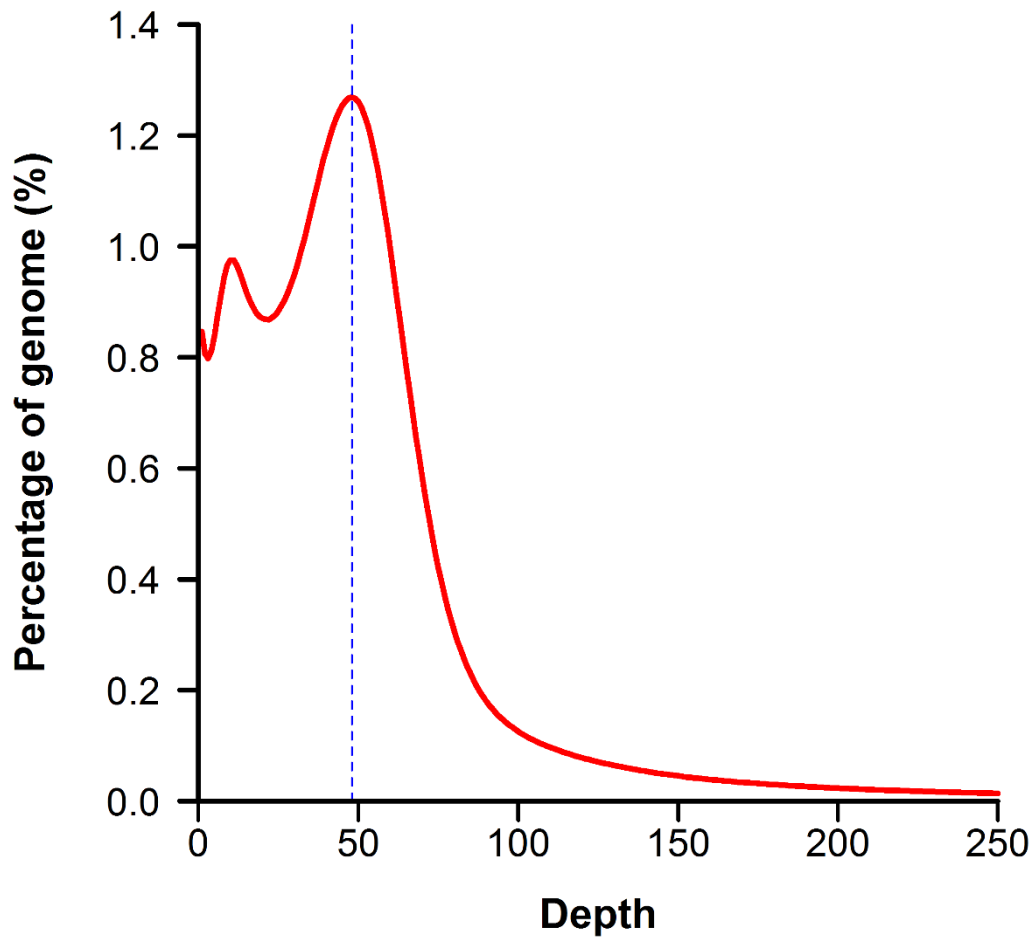

**Figure S5. Distribution of sequence depth across the assembled genome.**  
The Y-axis represents the proportion of the genome at a given sequencing depth.

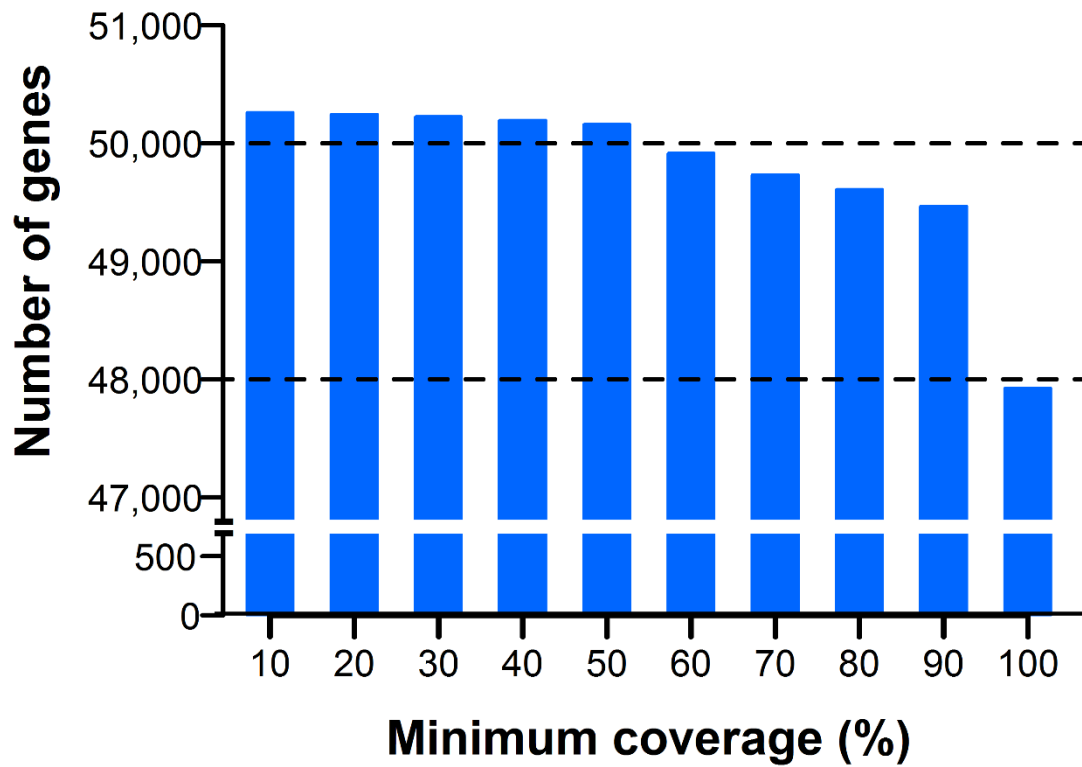

**Figure S6. Coverage of transcripts in the *A. duranensis* de novo assembly.**

The predicted genes were covered by transcripts with  $> 98\%$  identity, and the genes in each coverage were counted ranging from 10% to 100%.

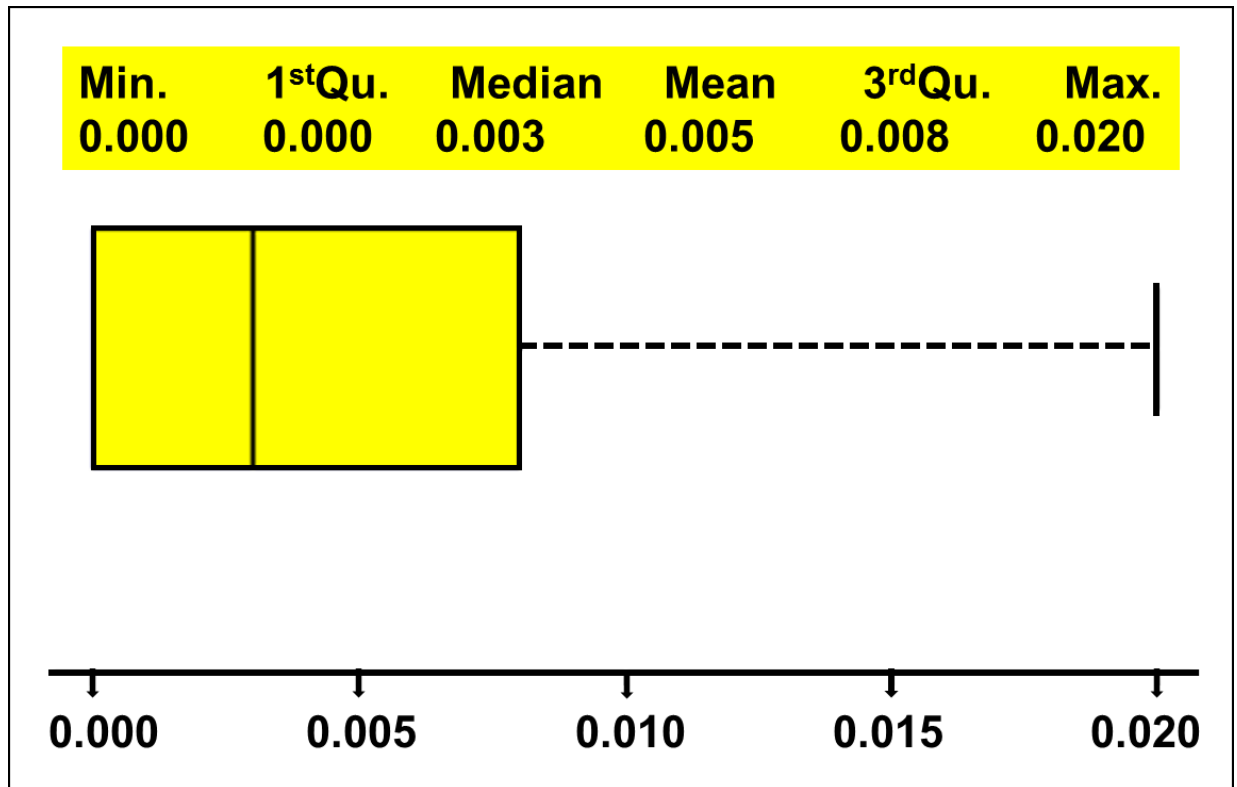

**Figure S7. Boxplot of the heterozygosity in 1-kb window of *A. duranensis* genome.**  
**Heterozygosity in each of 1 kb window was computed and plotted.**  
 The computed heterozygosity matches well with that by AllpathLG (~3 SNPs per kb).

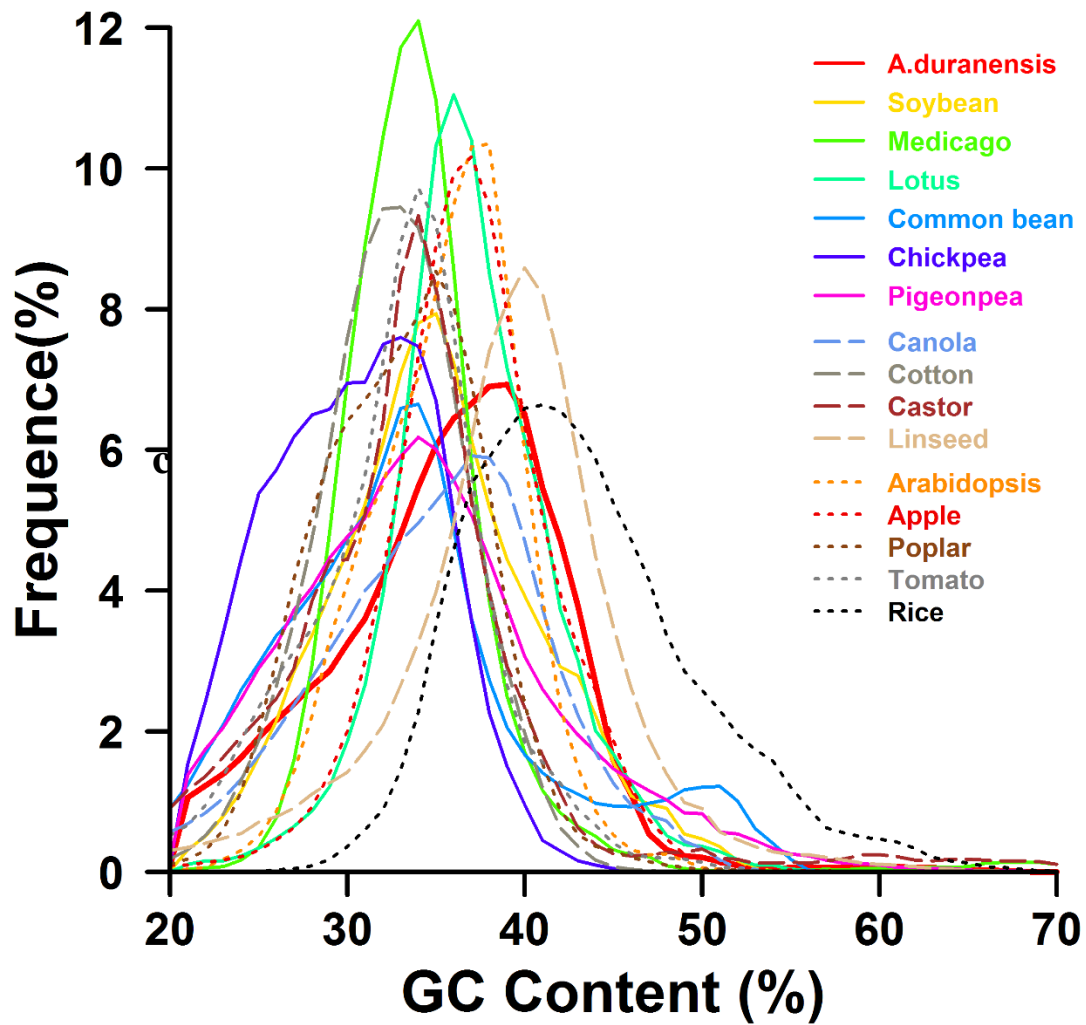

**Figure S8. Comparison of GC content distribution and variation among *A. duranensis*, legumes, oilseeds and other plant species.**  
 Solid lines represent legume species, dash lines represent oilseed species, and dot lines represent other distantly related plant species



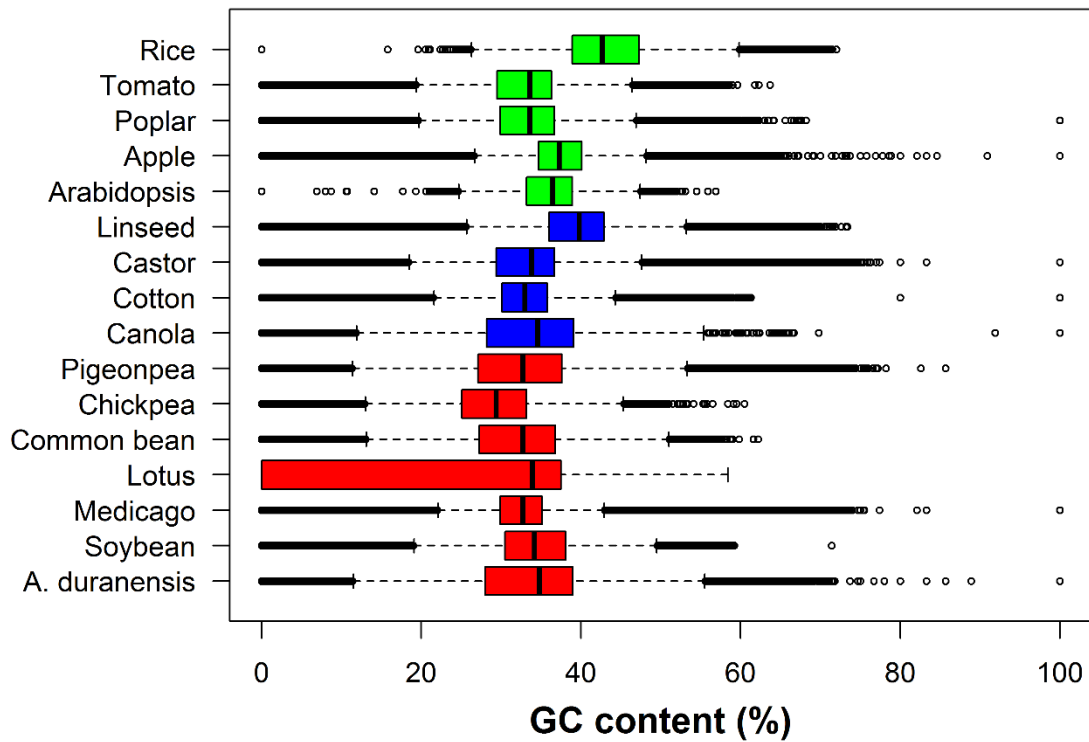

**Figure S9. Comparison of the range of GC content among *A. duranensis* and other plant species.**

The boxes display the likely range of the GC content variation (the interquartile range or IQR). The upper and lower bars represent upper and lower inner fences, respectively. The circles depict outliers in the GC content.

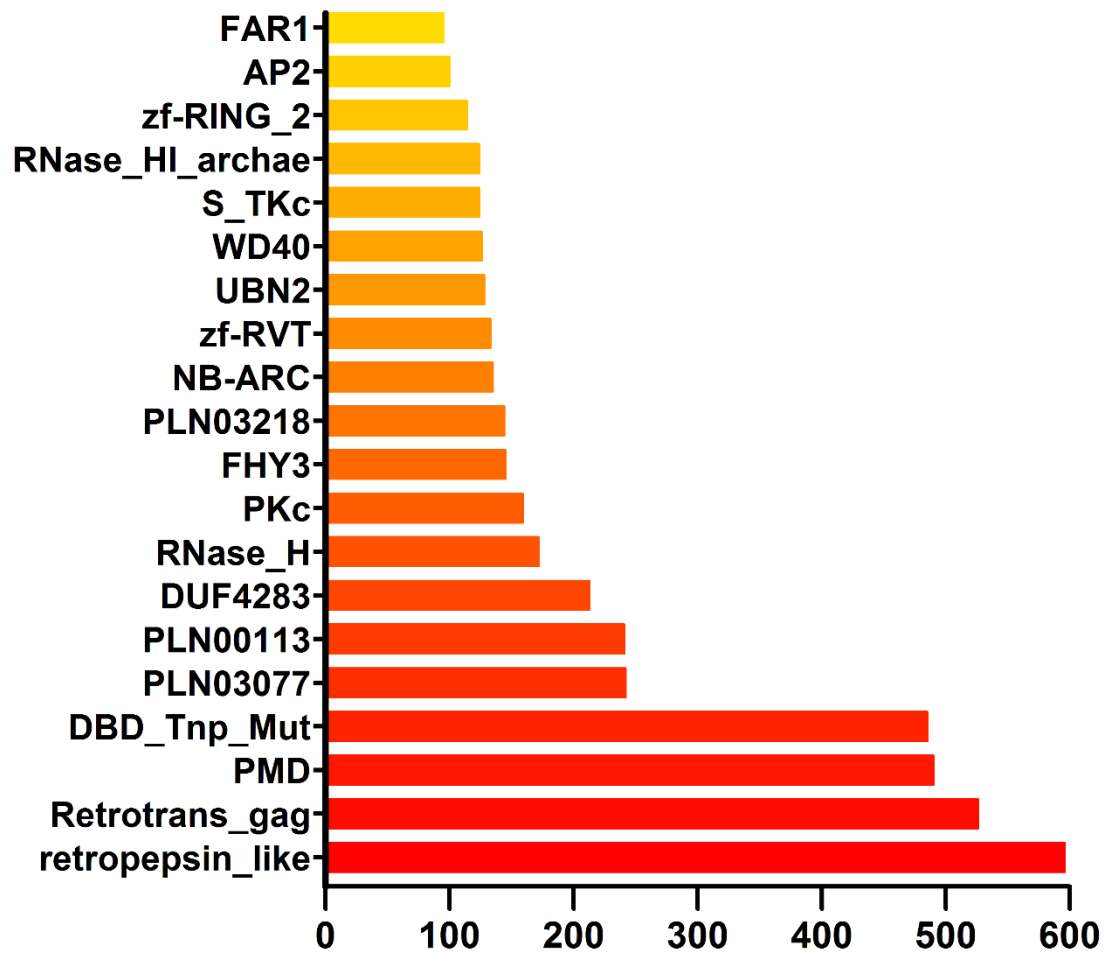

Figure S10. The top 20 Pfam domains for the *A. duranensis* genome.

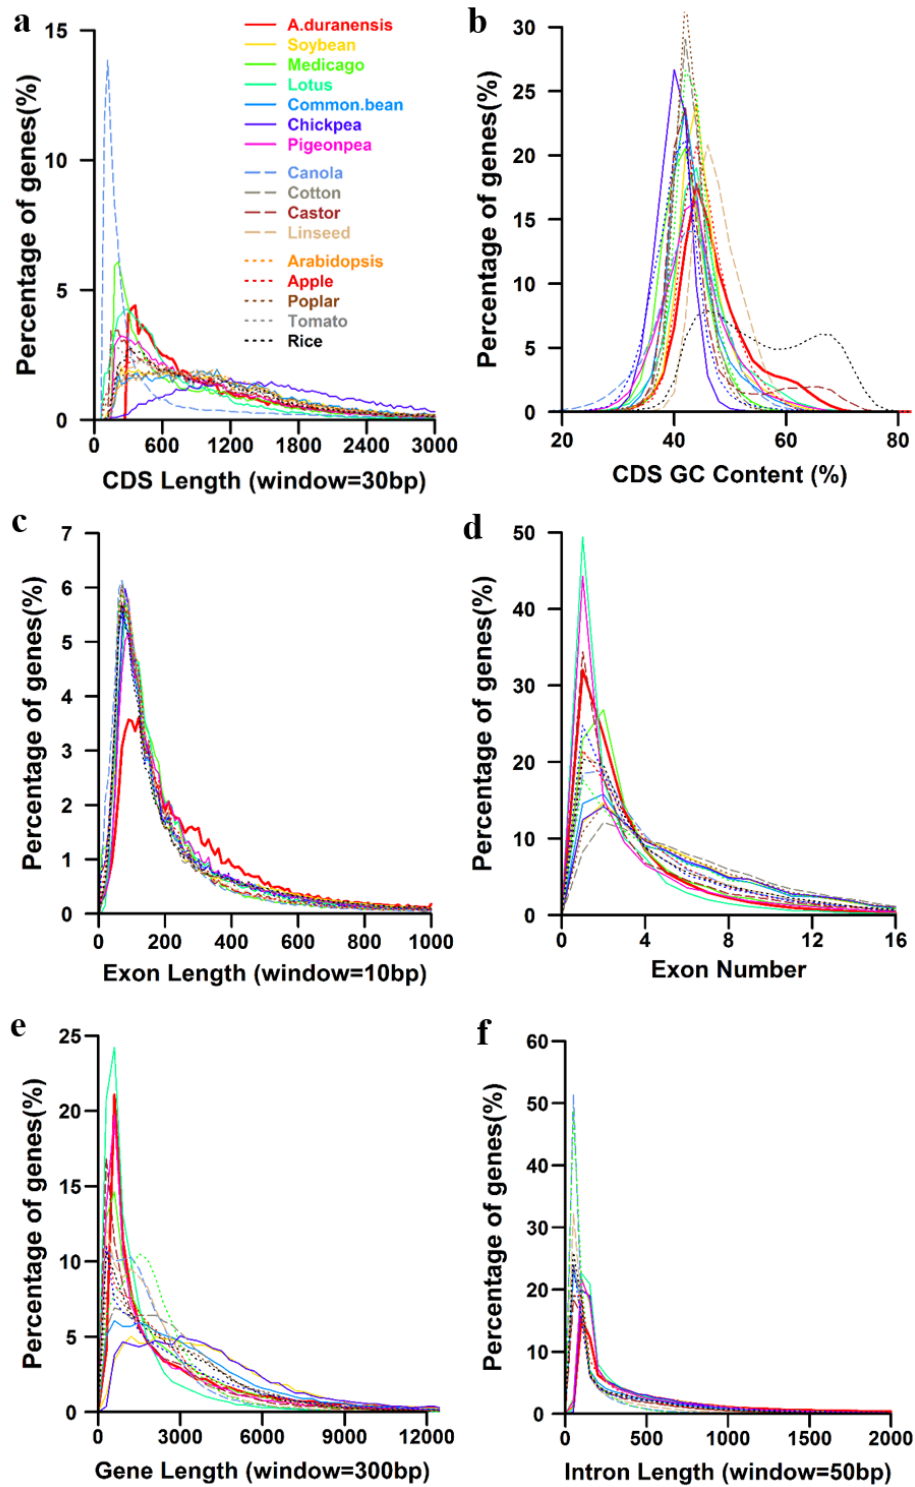

**Figure S11. Distribution comparison of (a) CDS length, (b) CDs GC content, (c) exon length, (d) exon number, (e) gene length and (f) intron length among *A. duranensis* and other plant species.**

The red solid line presents the distribution in *A. duranensis*. Solid lines represent legume species, dash lines represent oilseed crops and dot lines represent other plant species.

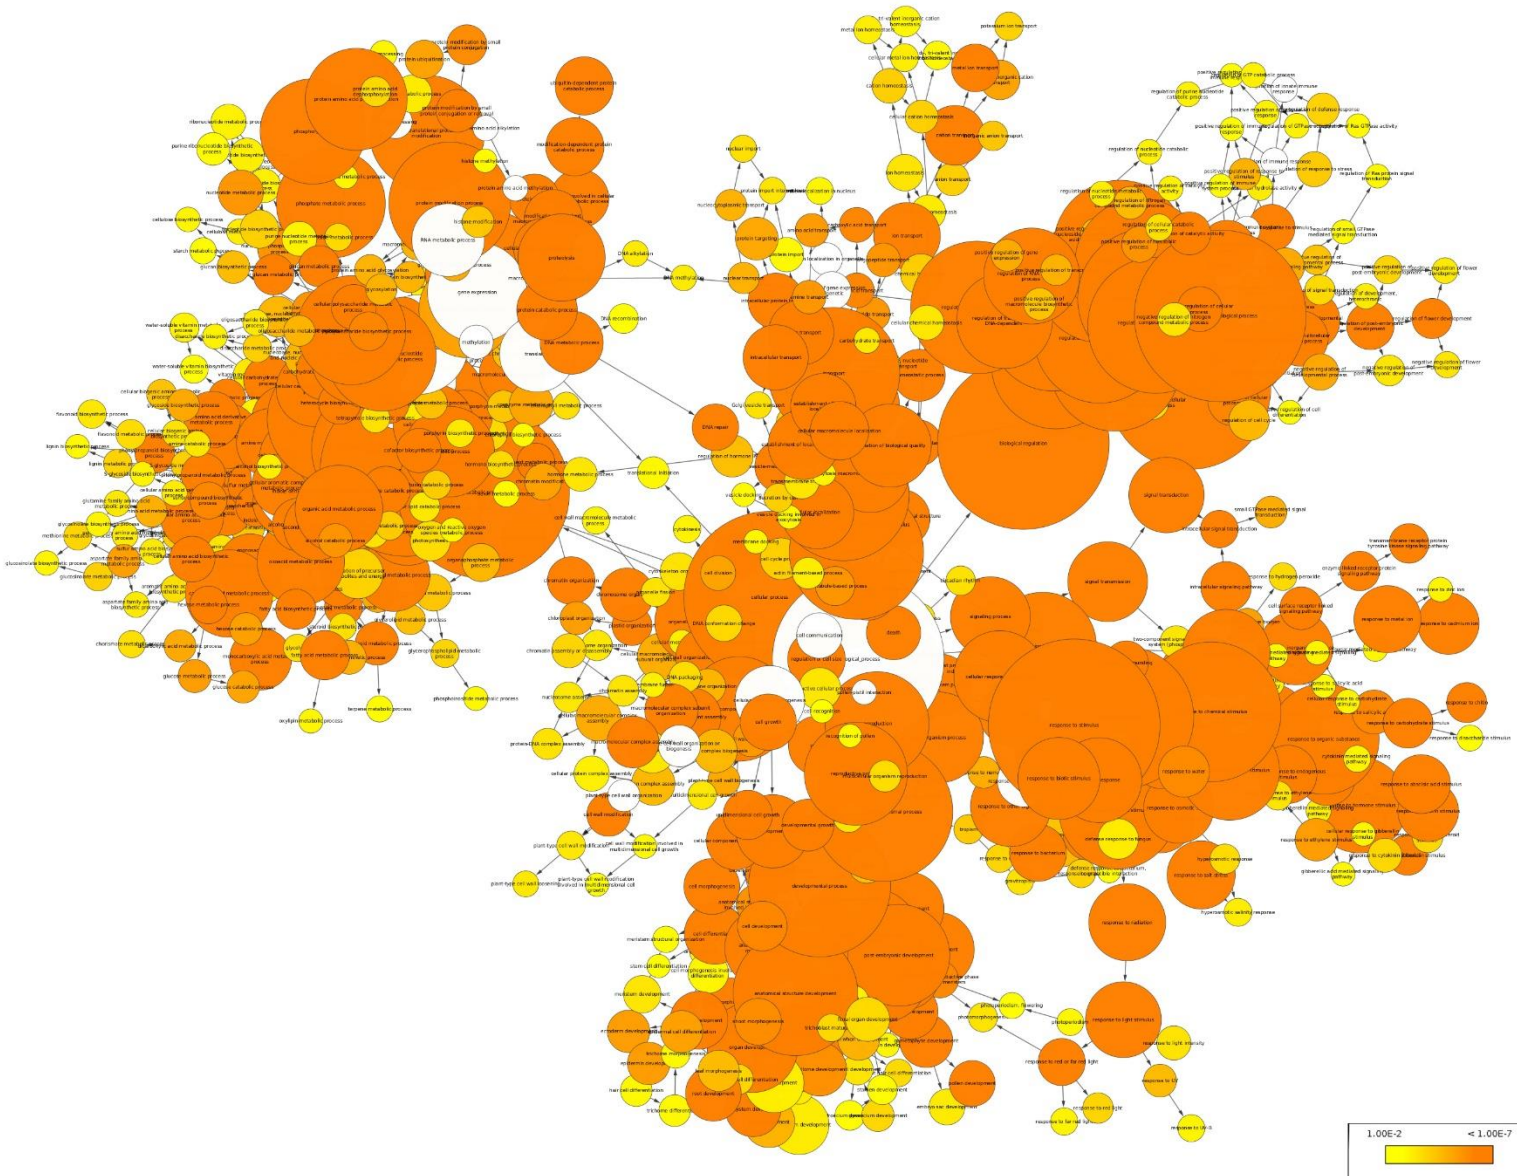

Figure S12. Enriched GO terms for biological process



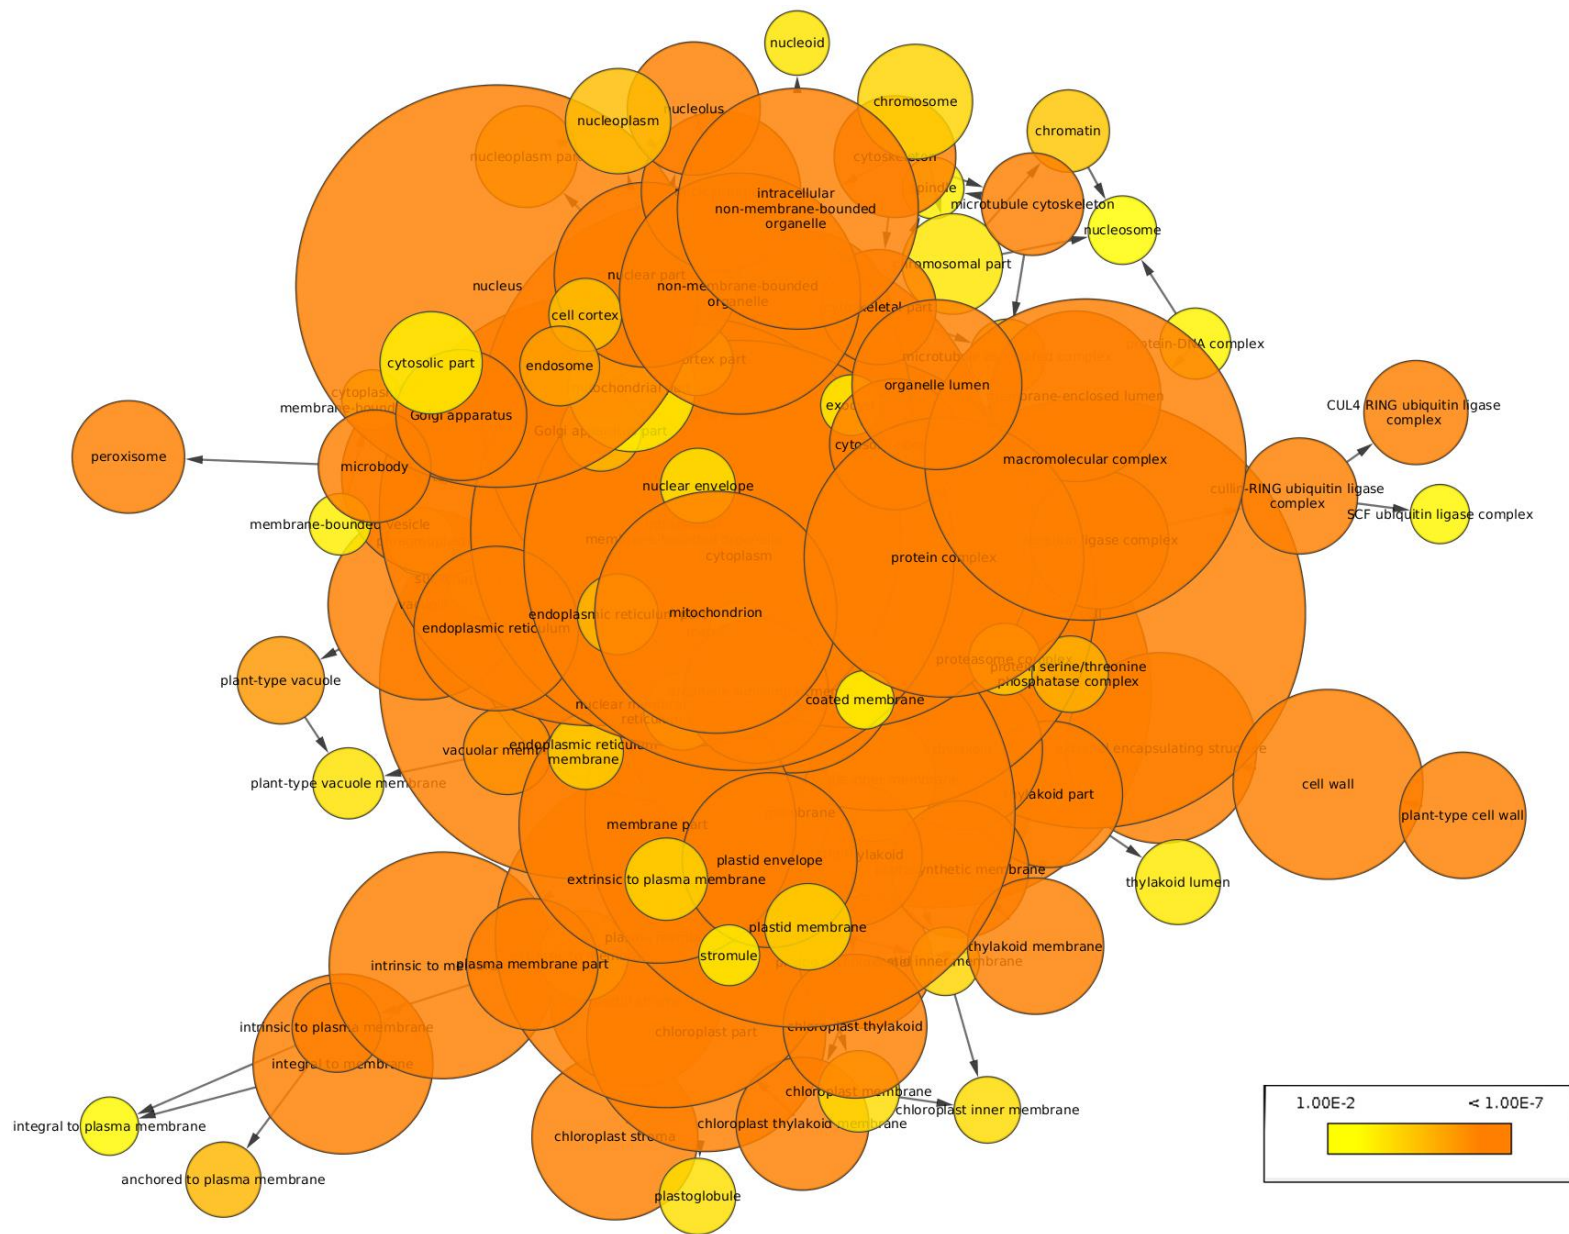

**Figure S14. Enriched GO terms for cellular components**

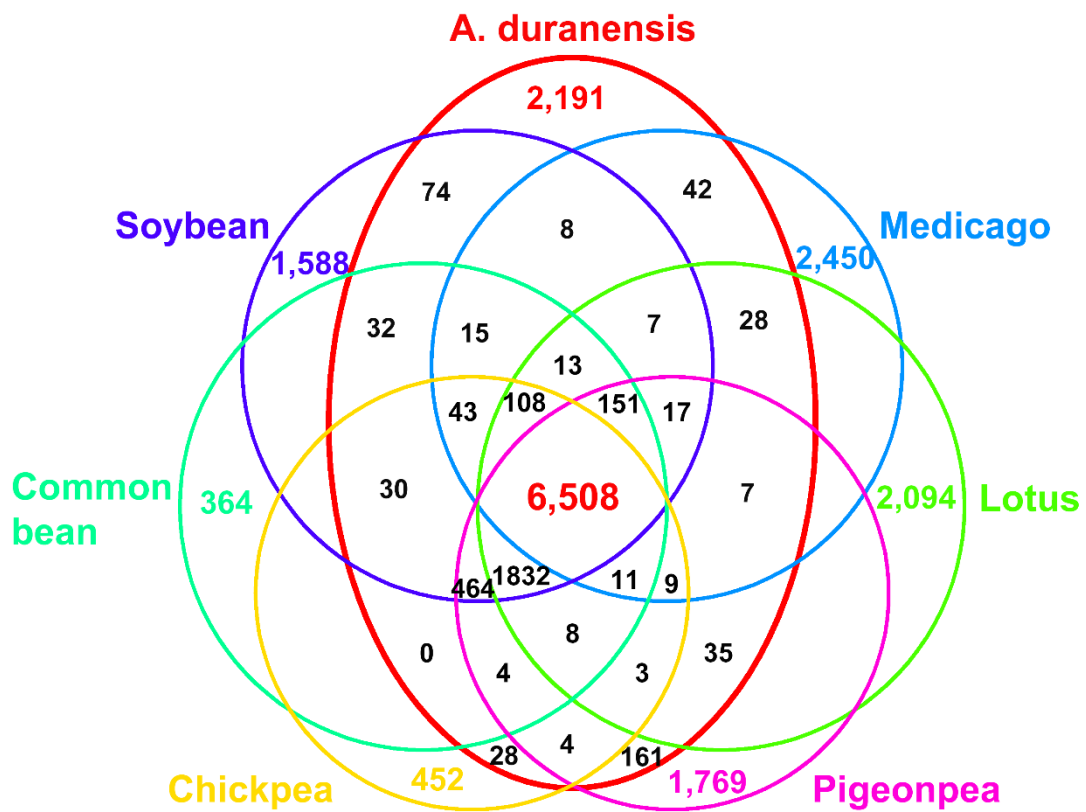

Figure S15. Venn diagram showing shared and unique gene families among legume crops.





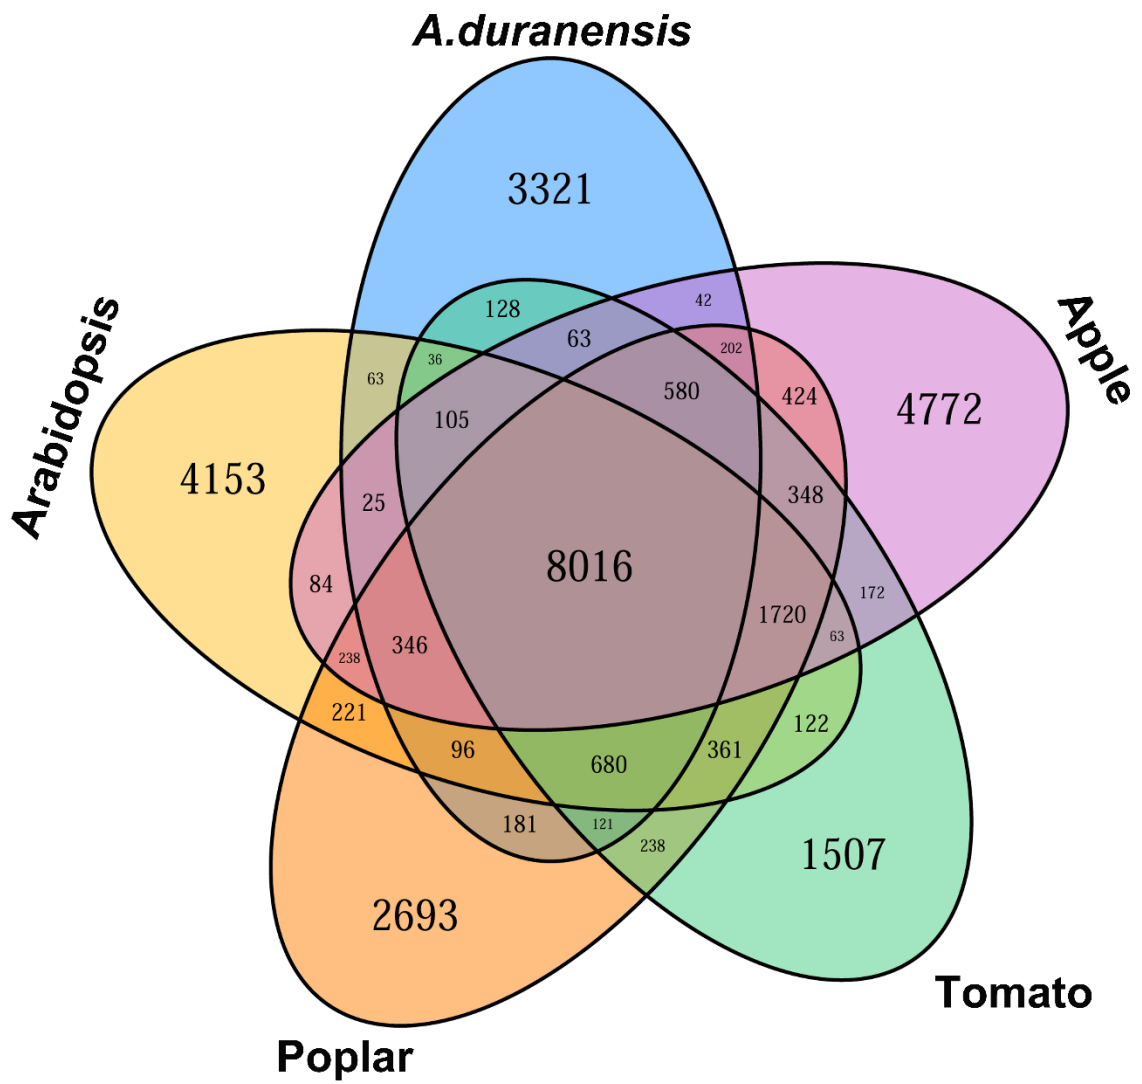

**Figure S17. Venn diagram showing shared and unique gene families among distantly related plant species.**

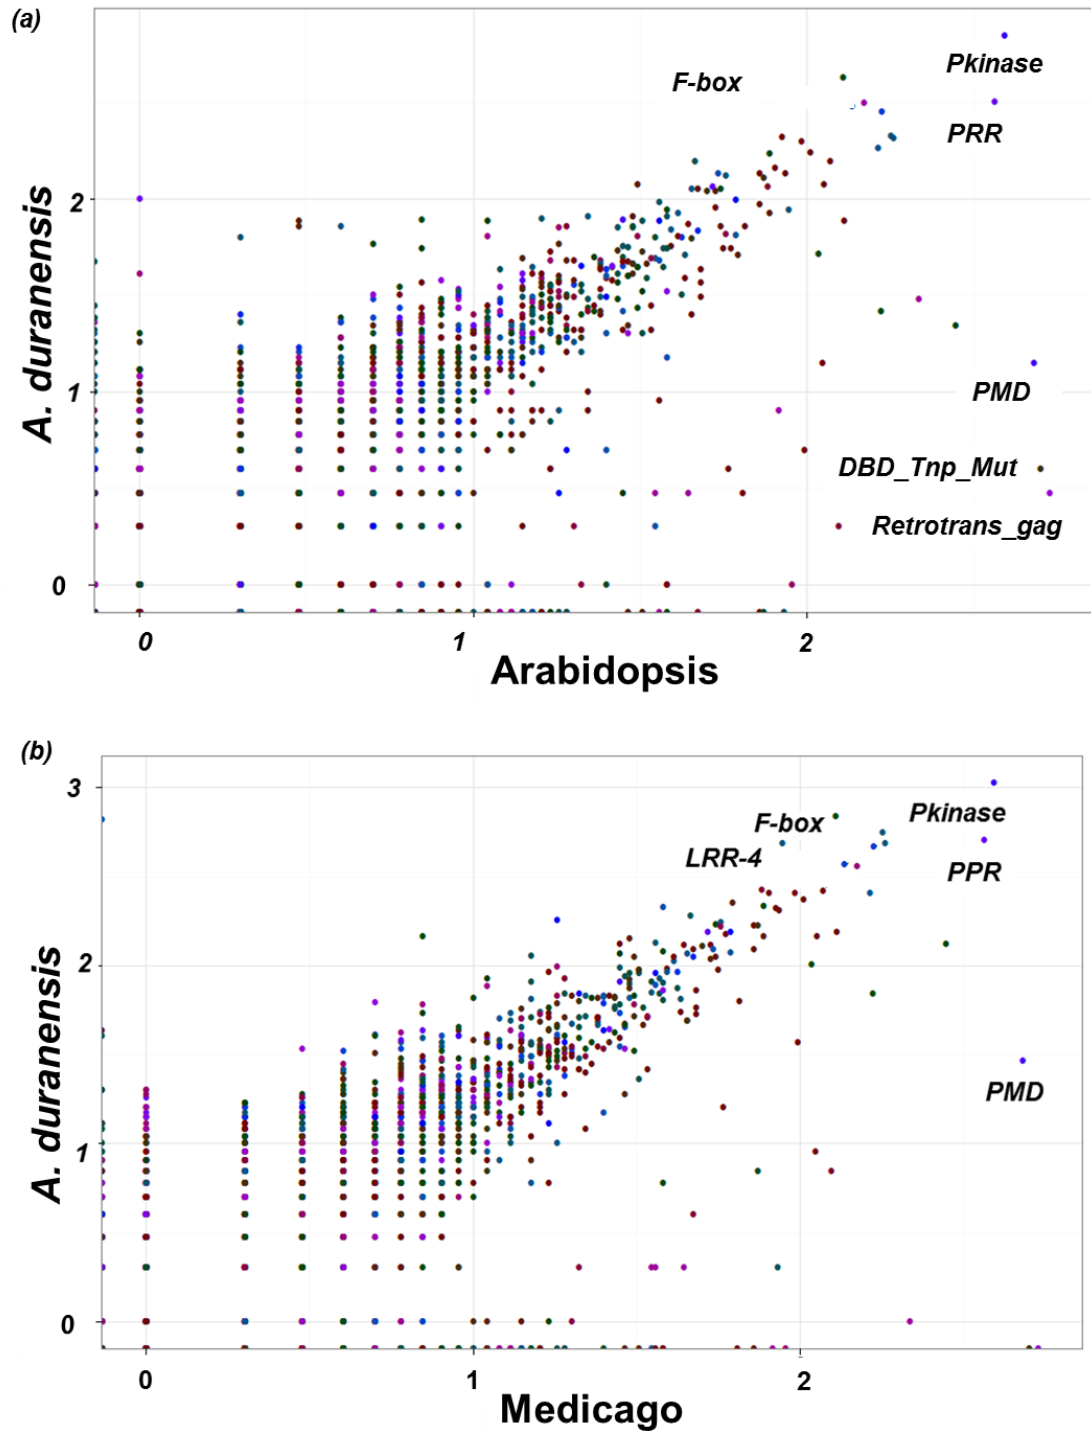

**Figure S18. Pairwise scatterplot of gene family members between *A. duranensis* and *Arabidopsis* as well as *Medicago*.**

The number of members in each family are log10 transformed, and then plotted pairwise. The values >2.5 are only labelled to ease visualization.

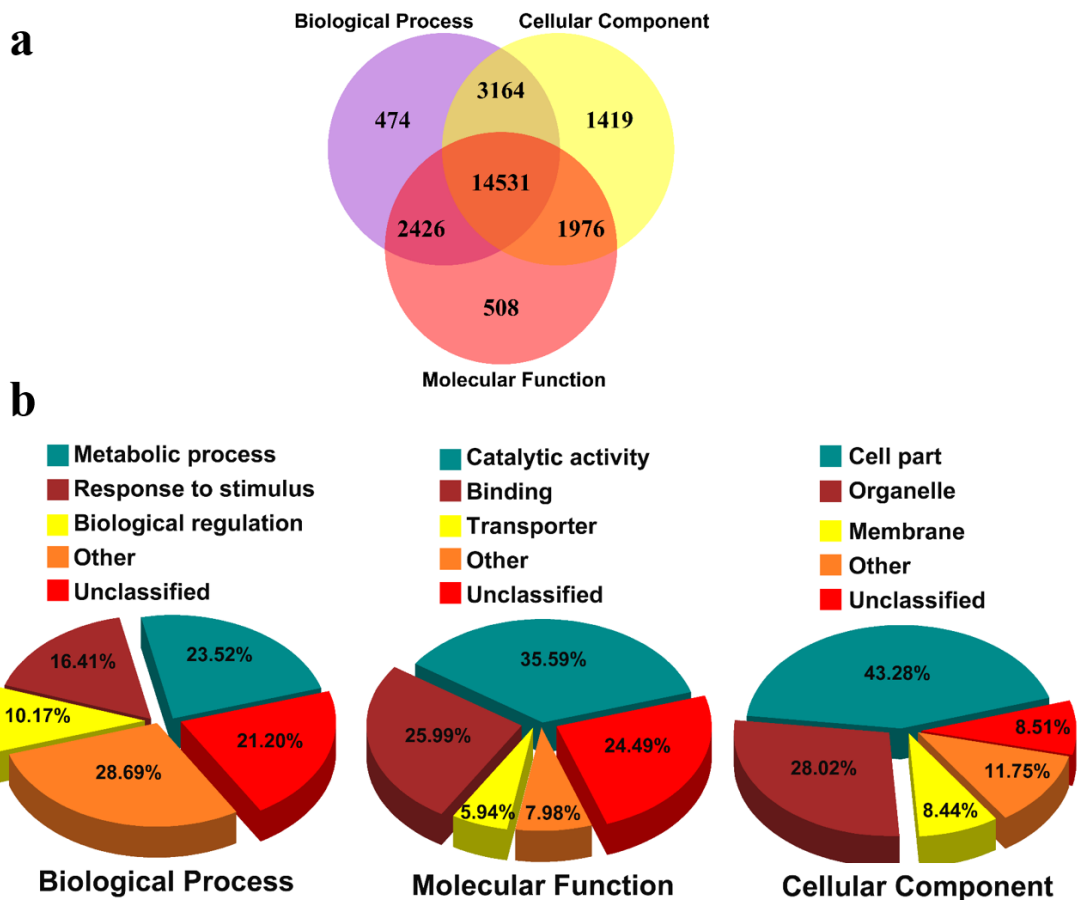

**Figure S19. Venn diagram of GO annotation (overlapping genes among three ontologies) in *A. duranensis* predicted protein-coding genes.**

This figure shows (a) the intersection and relationship of each ontology, and (b) the fractions for the top 4 categories in each ontology and the remaining categories.

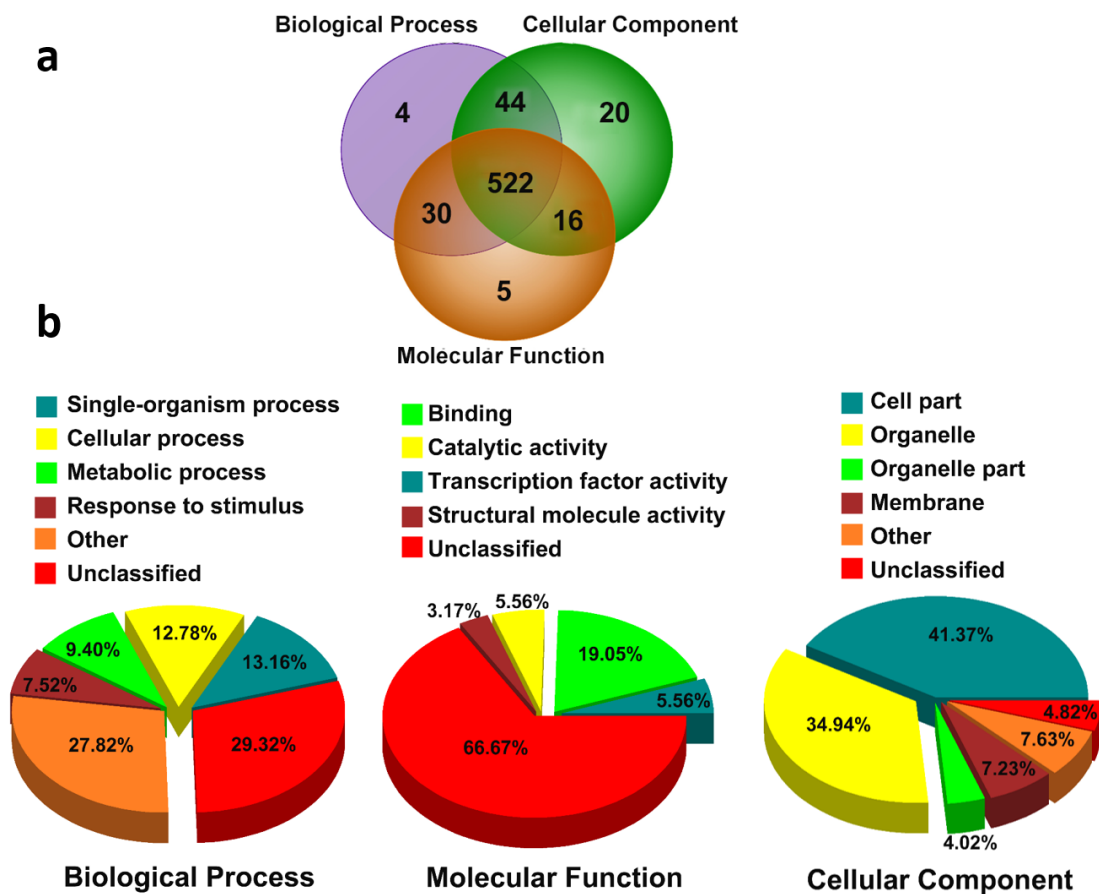

**Figure S20. Venn diagram of GO annotation (overlapping genes among three ontologies) in *A. duranensis* specific genes.**

This figure shows (a) the intersection and relationship of each ontology, and (b) the fractions for the top 4 or 5 categories in each ontology and the remaining categories.

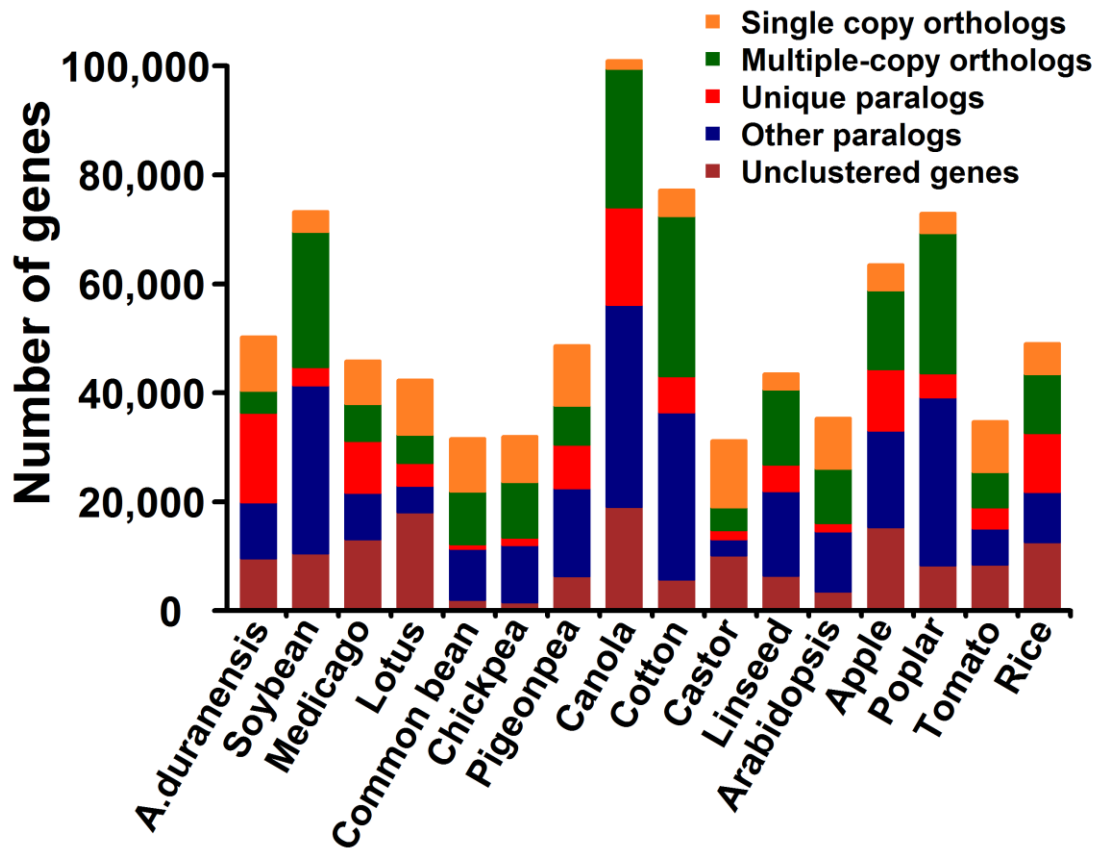

Figure S21. Comparison of orthologous genes among *A. duranensis* and other plant species.

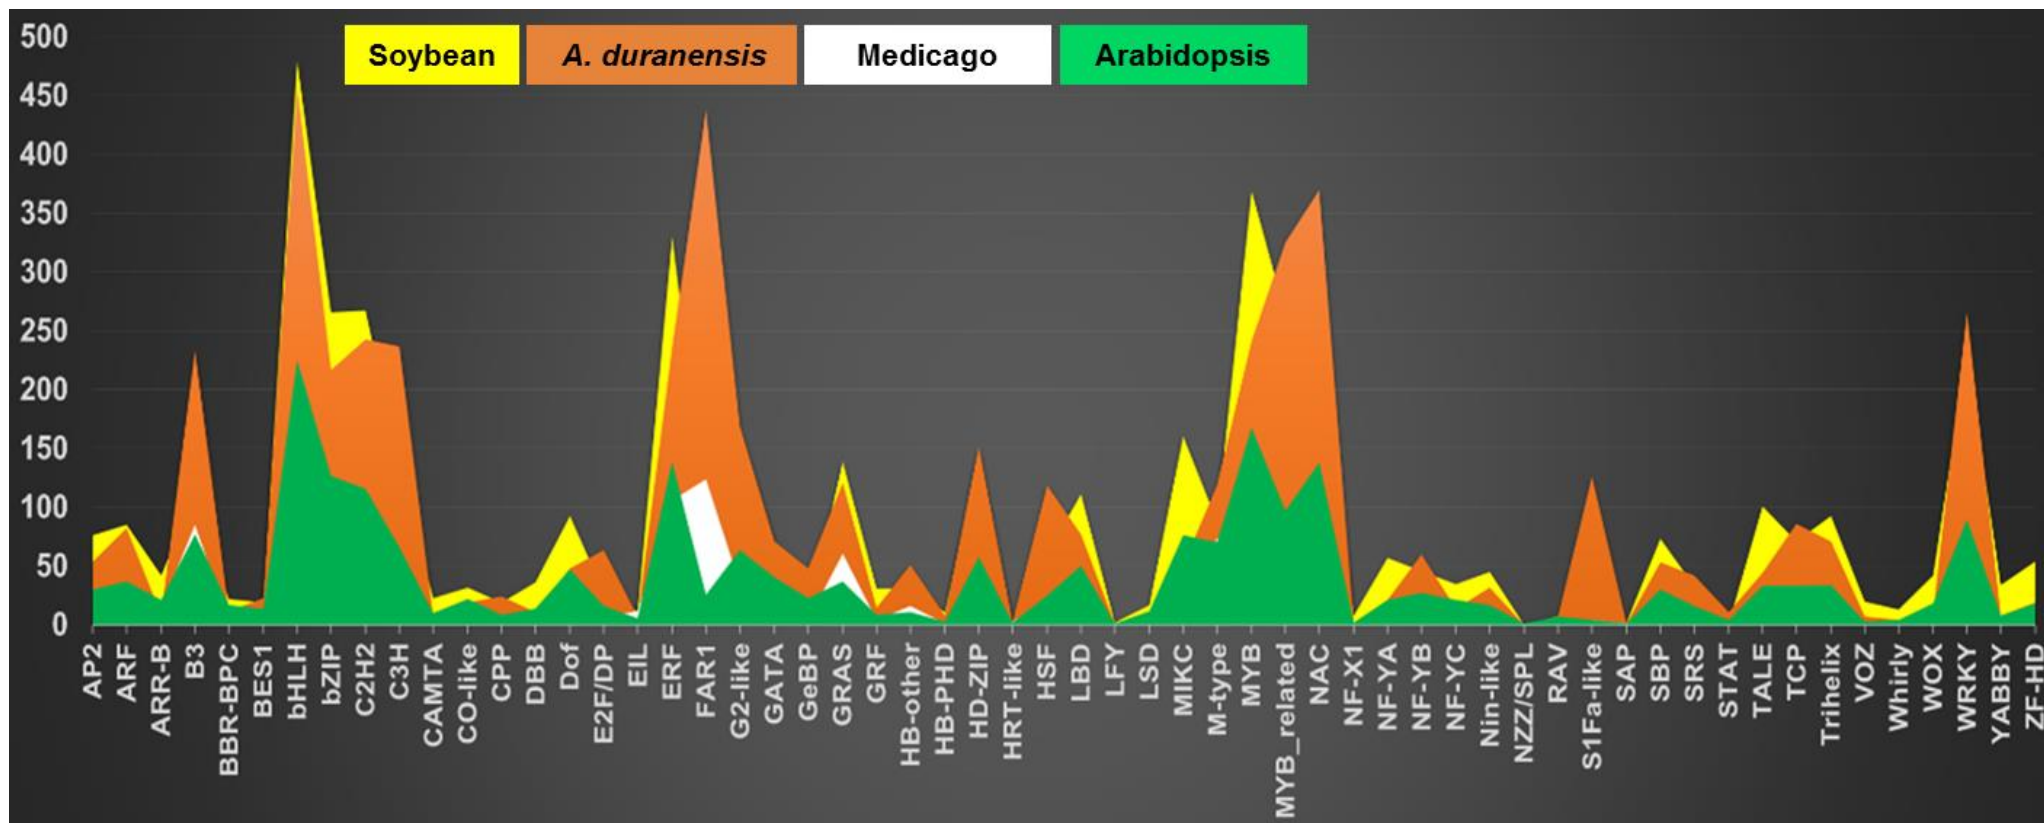

Figure S22. Distribution of TF genes in different TF families among the four species.

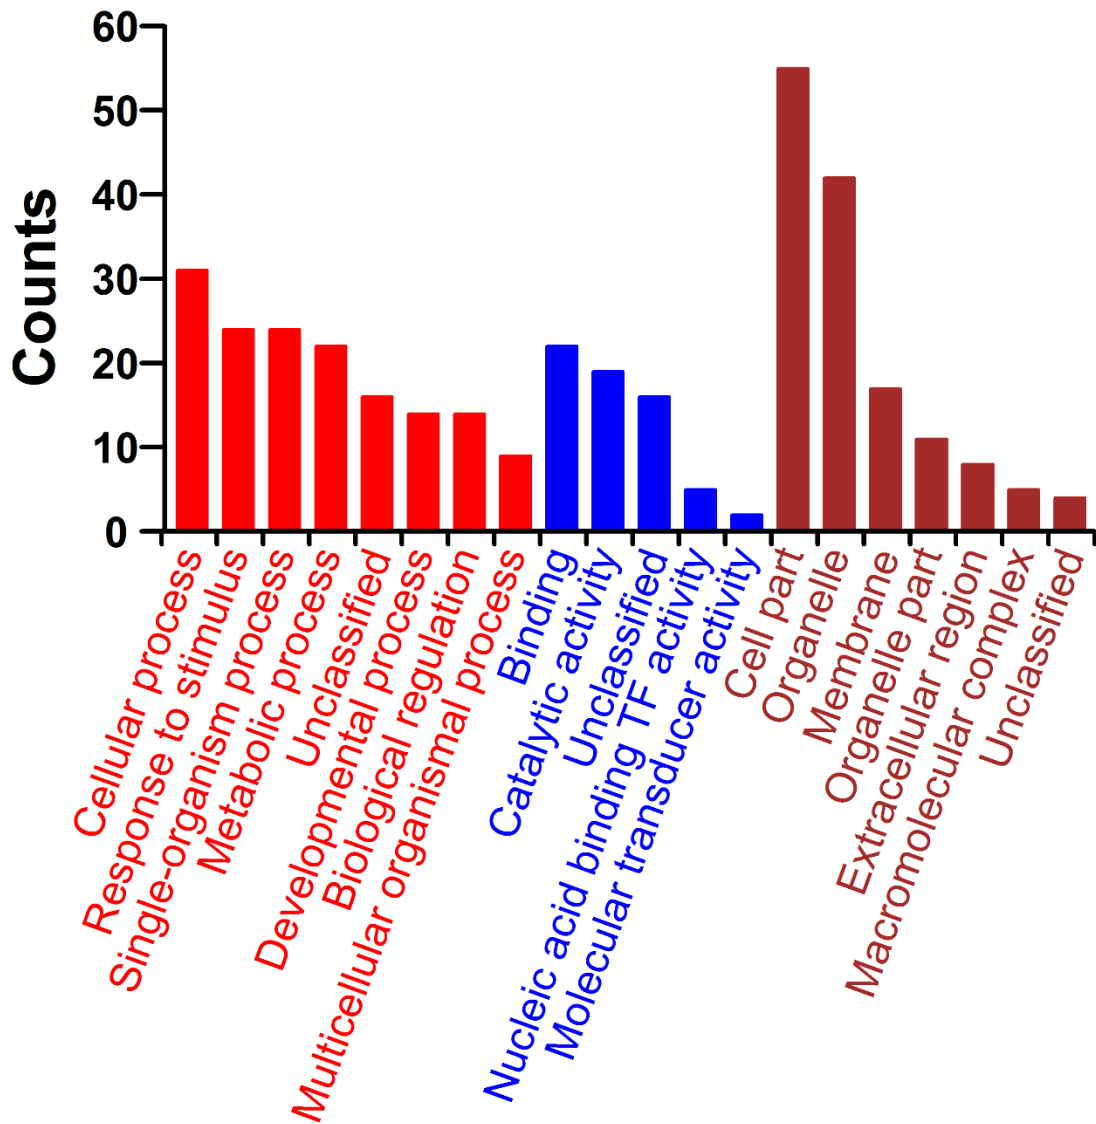

**Figure S23. GO classification of miRNA target genes in *A. duranensis*.**

Red colors represent categories of Cellular Component, blue colors represent categories of Biological Process, and brown colors represent categories of Molecular Function.



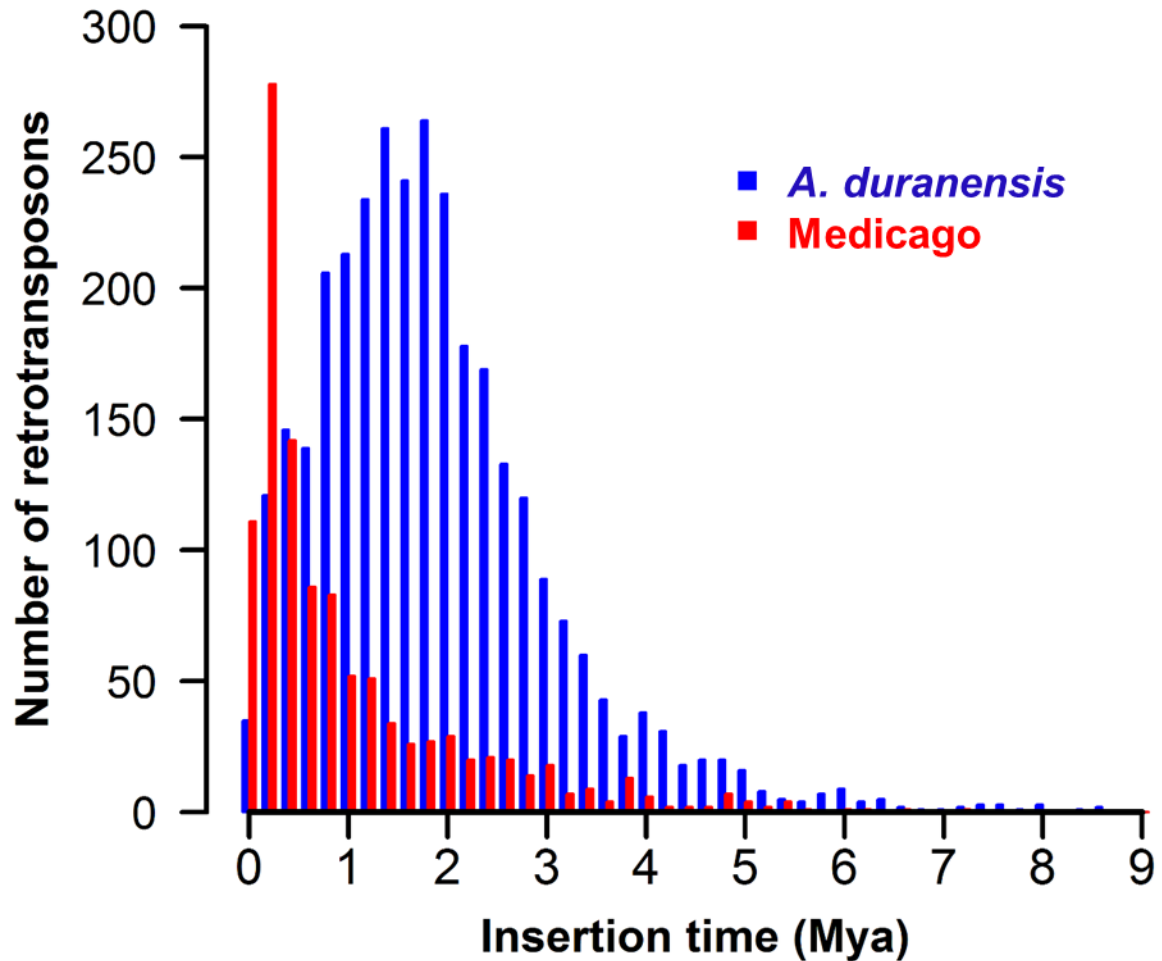

**Figure S24. Dating the LTR retrotransposon insertion time. Dating of *M. truncatula* LTR retrotransposons was used as a comparison.**

LTR retrotransposon sequences found by LTR\_finder were clustered by CD-HIT at 90% of sequence similarity with 90% coverage of the shorter sequence. The LTR sequences were not included in the calculation of sequence similarity and coverage. The longest in each cluster was selected as the representative member, of which LTRs were aligned and transitions and transversions were computed and used for the insertion time computation.

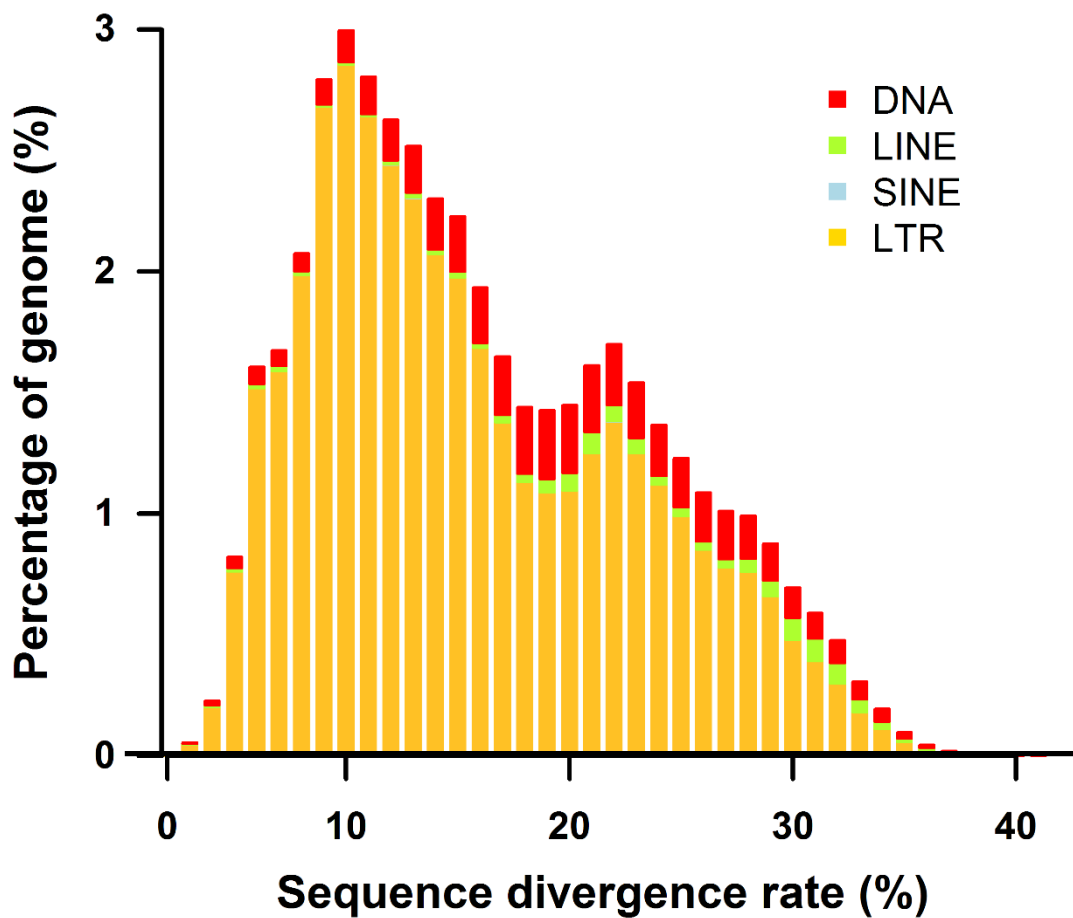

**Figure S25. Distribution of divergence rate of different repetitive elements (DNA elements, LINE, LTR, SINE) in the *A. duranensis* genome.**

Divergence rate was calculated between the identified TEs in the genome and the consensus sequence in the TE library (Repbases: <http://www.girinst.org/repbases>). DNA, DNA elements; LINE, long interspersed nuclear elements; LTR, long terminal repeat transposable element; SINE, short interspersed nuclear elements.

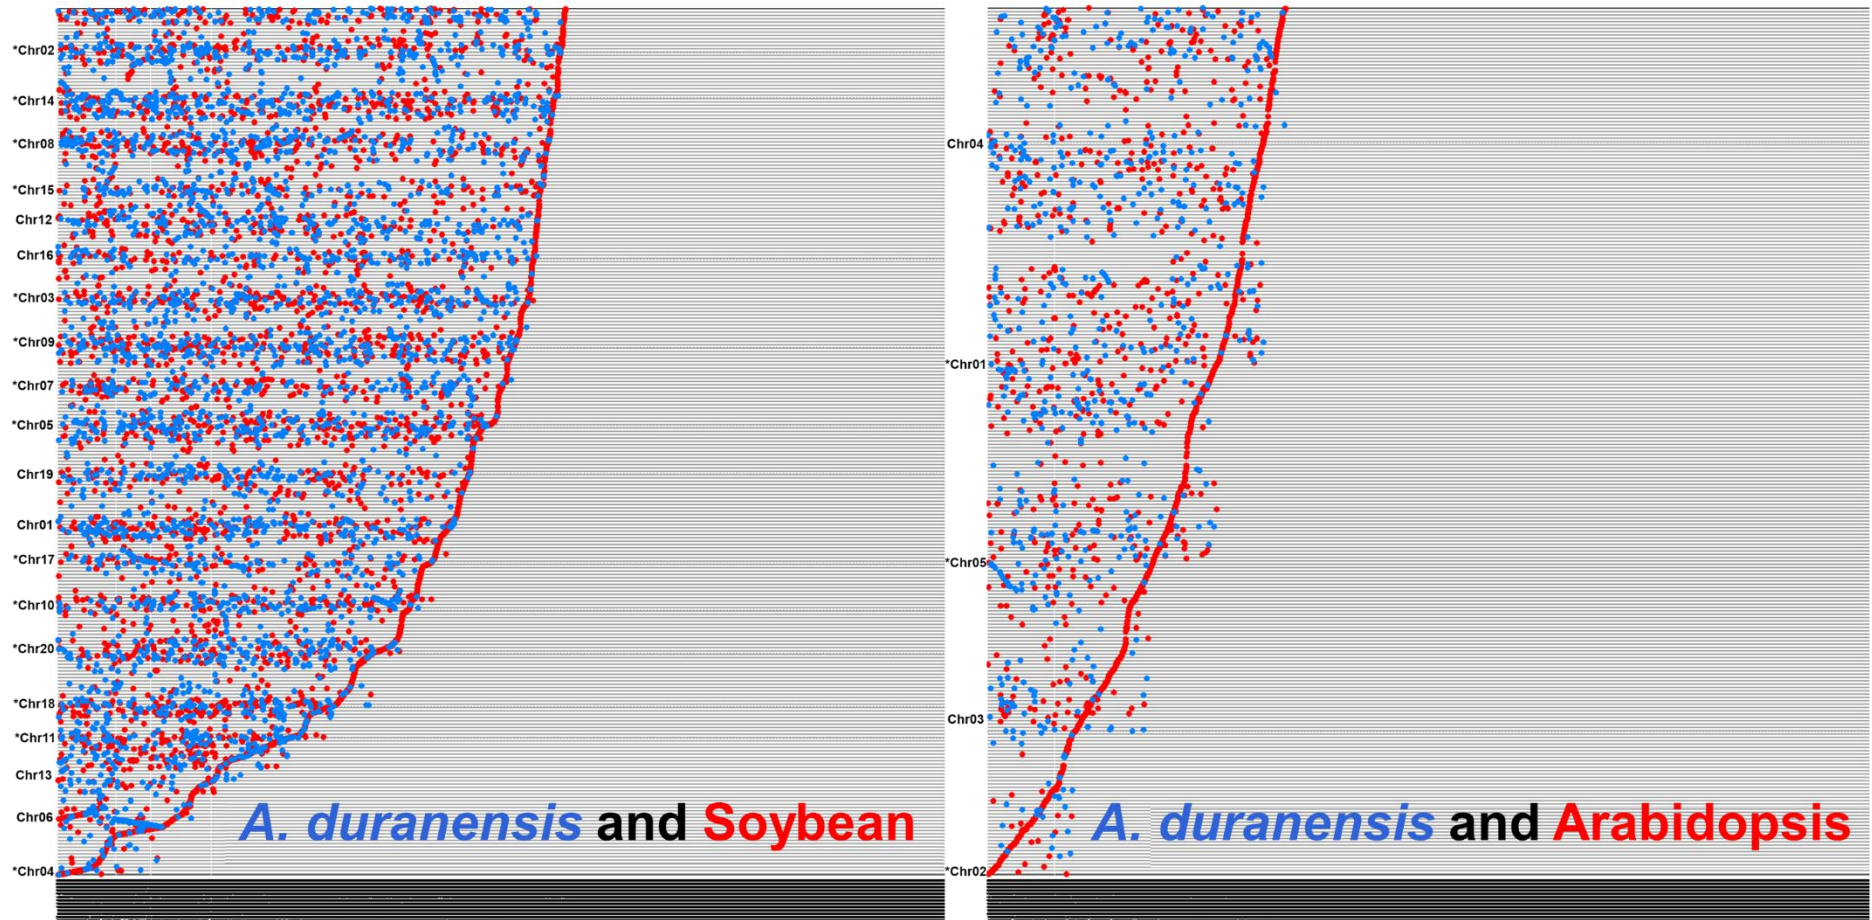

Figure S26. Syntenic blocks between *A. duranensis* scaffolds and Soybean and Arabidopsis chromosomes.

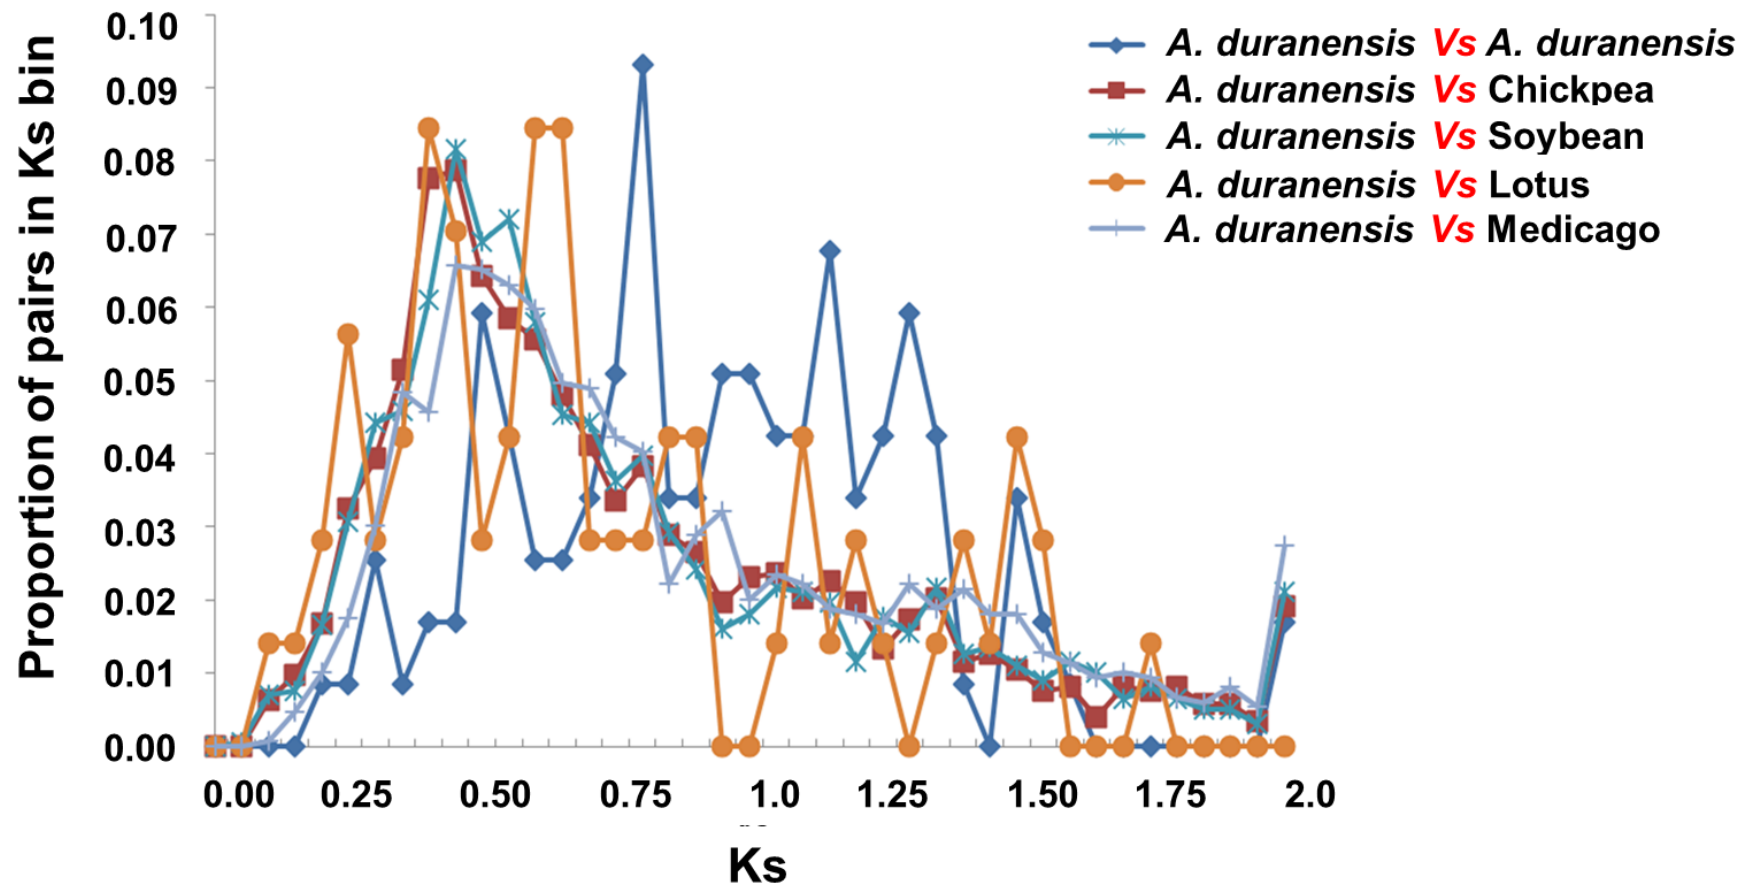

Figure S27. Ks analysis of legume species.

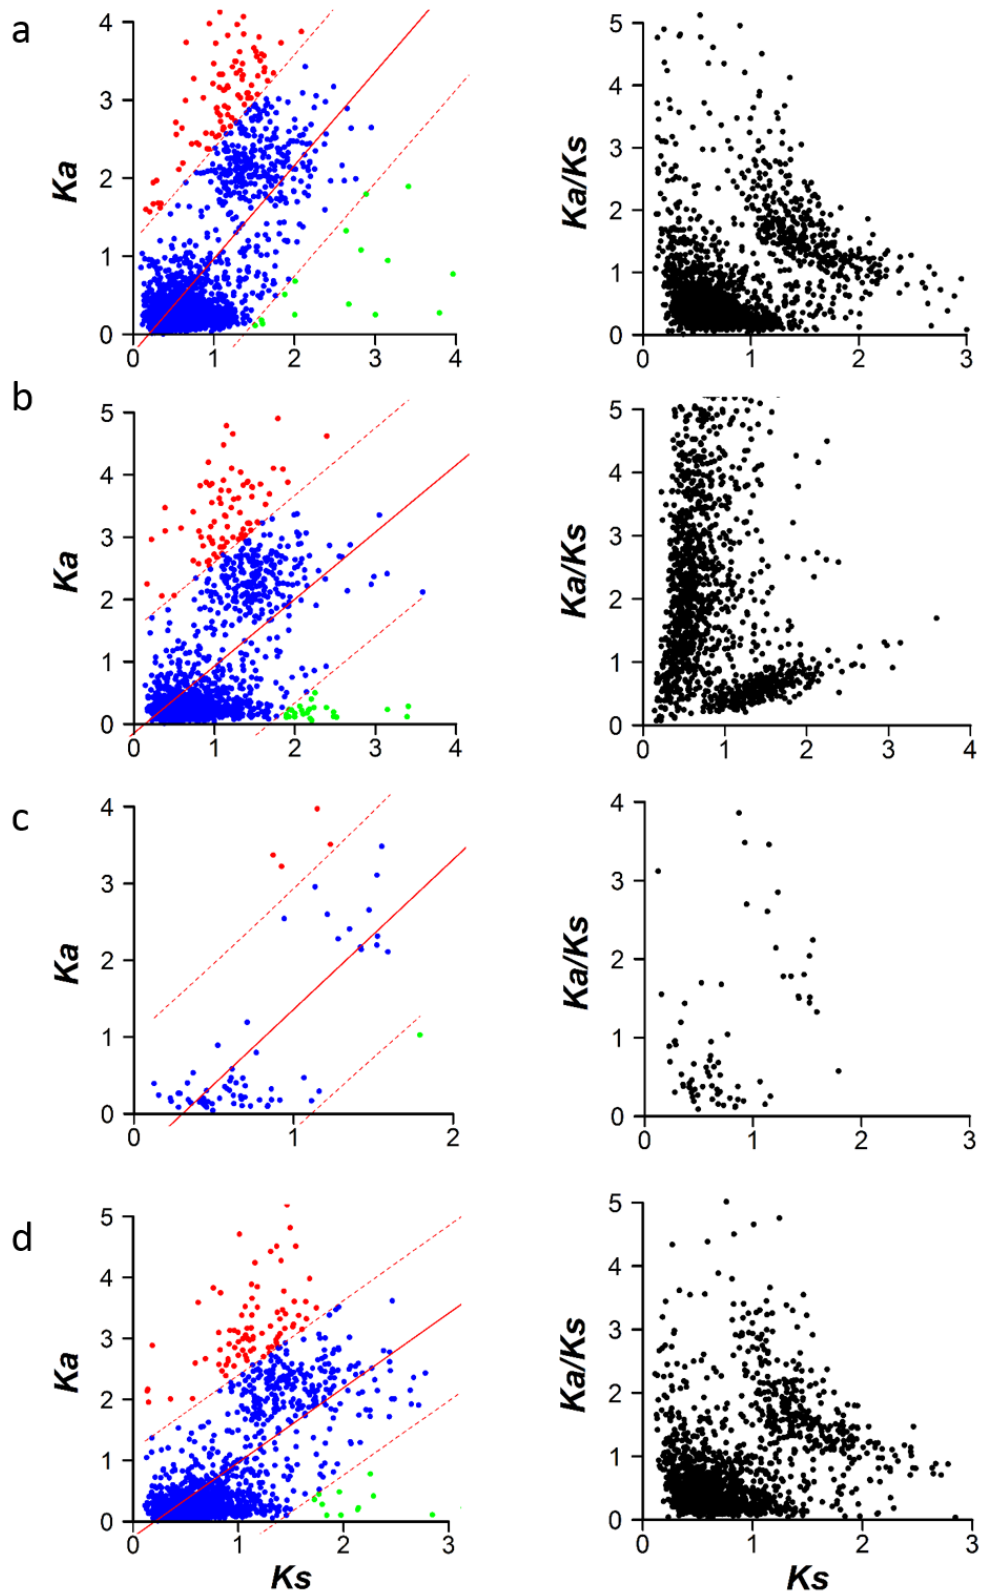

Figure S28. Scatterplot of  $K_s$  vs.  $K_a$  of orthologs between *A. duranensis* and soybean (a), *Medicago* (b), *Lotus* (c) and pigeonpea (d).

The dashed line represents the prediction interval about the linear regression. Red and green dots represent high and low  $\omega$  ( $Ka/Ks$ ) gene pairs, respectively.

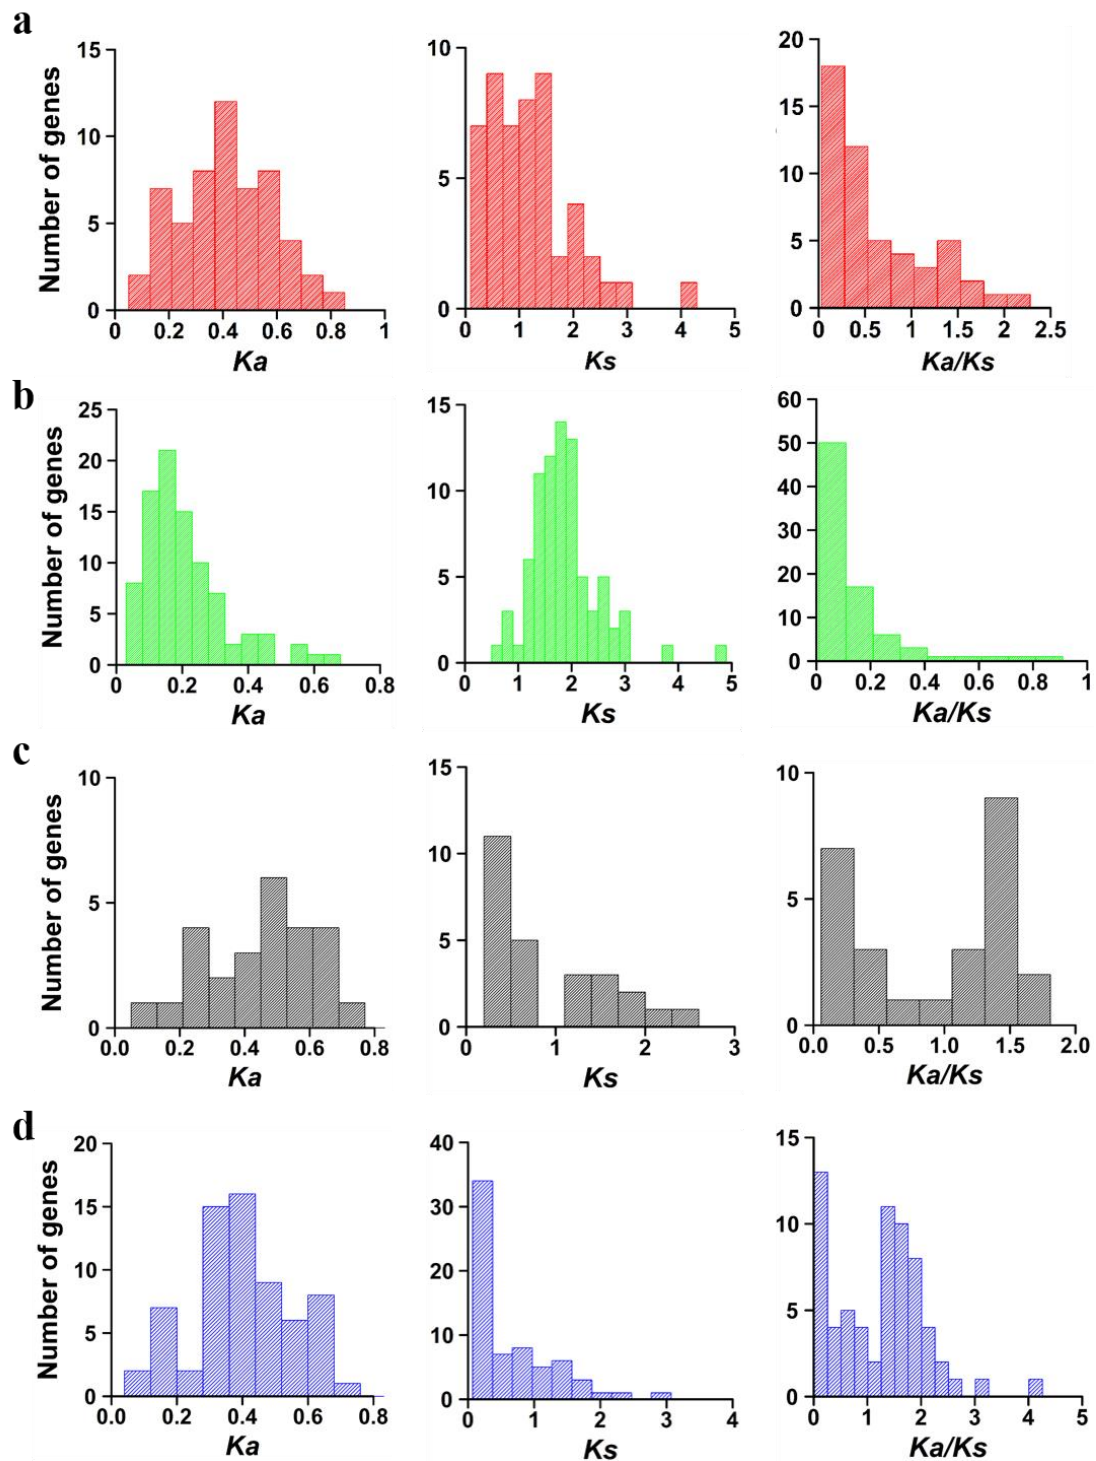

**Figure S29.** Distribution of  $Ka$ ,  $Ks$  and  $\omega$  ( $Ka/Ks$ ) in pairs of (a) *Arabidopsis* and *A. duranensis* genes involved in gravitropism as well as in (b) *Arabidopsis* and

soybean. (c) Distribution of  $Ka$ ,  $Ks$  and  $\omega$  in pairs of *Arabidopsis* and *A. duranensis*  
(c) genes related to photomorphogenesis as well as of (d) *Arabidopsis* and soybean.

**a**

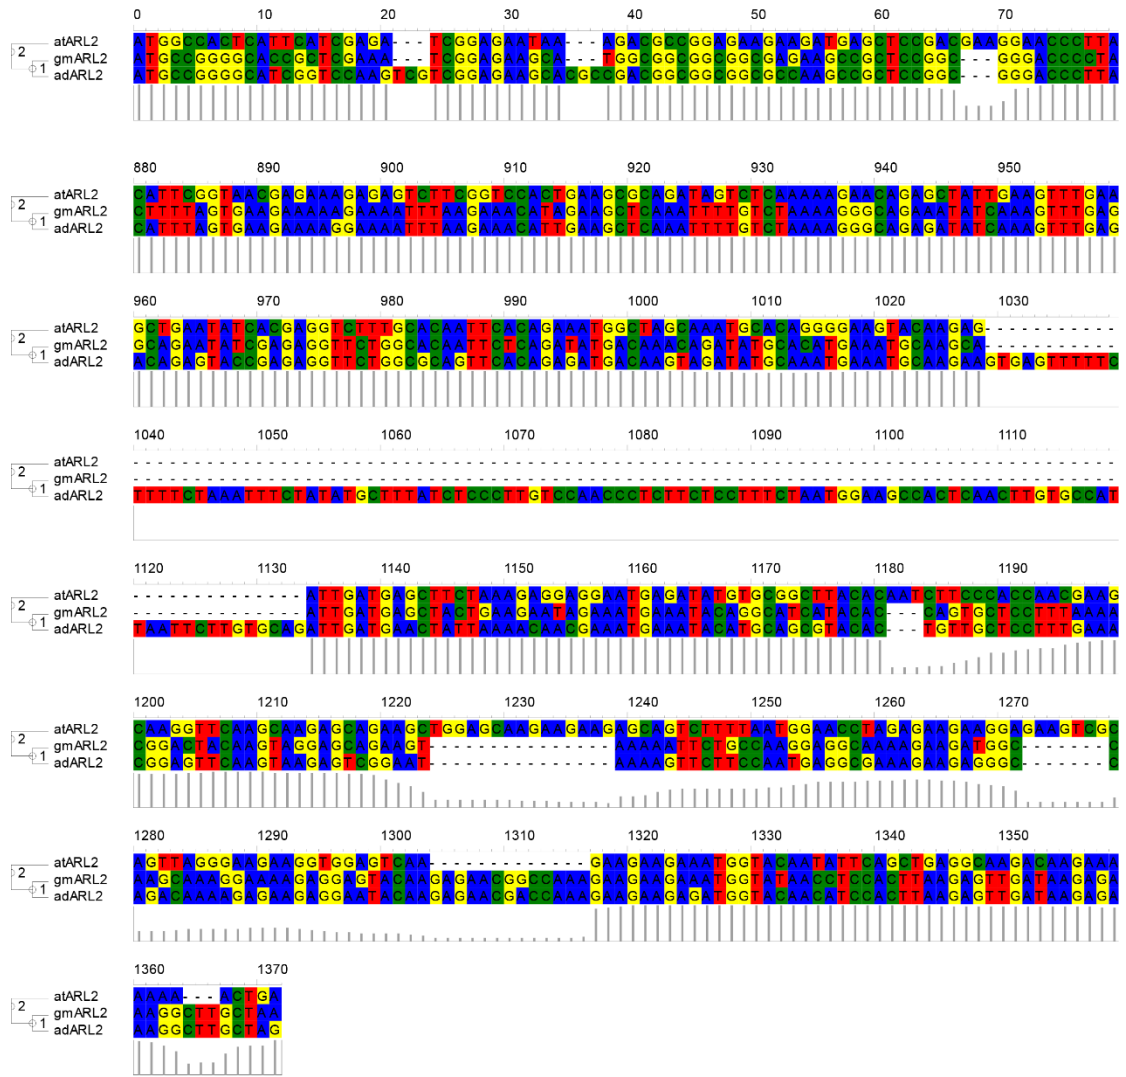



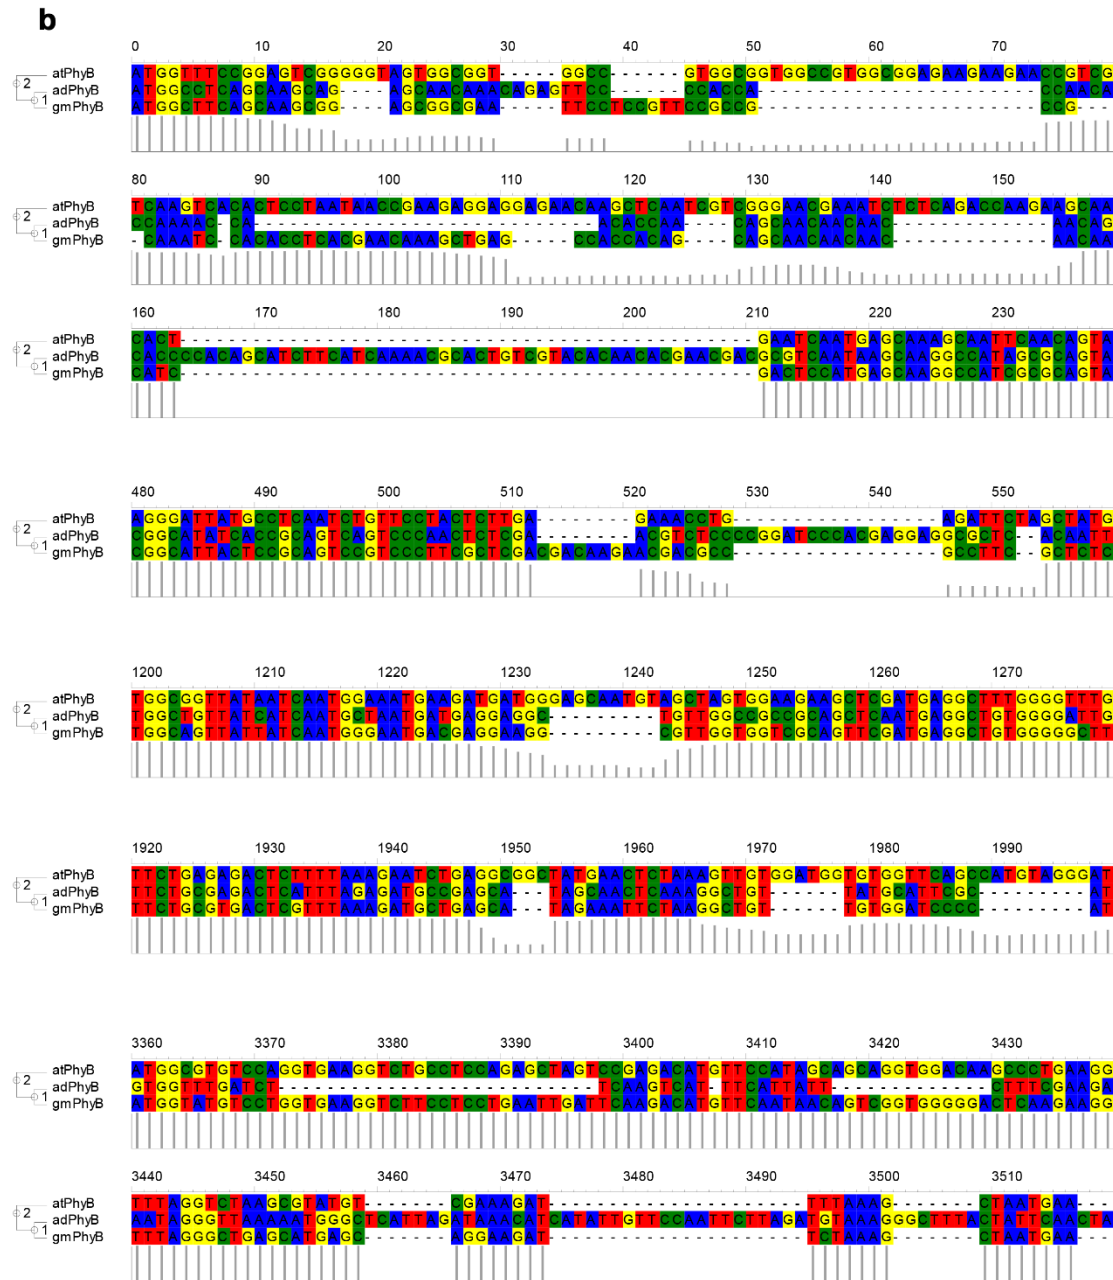

**Figure S30. SNPs and Indels of representative genes under positive selection for gravitropism *ARL2* (a) and photomorphogenesis *phyB* (b) in *A. duranensis* (ad), *Arabidopsis* (at) and soybean (gm).** Phylogeny-aware alignments of these genes were performed using PRANK and visualized using PRANKSTER. The approximate guide trees is indicated in left for each alignment. Alignments resulting in large-effect indel are shown.

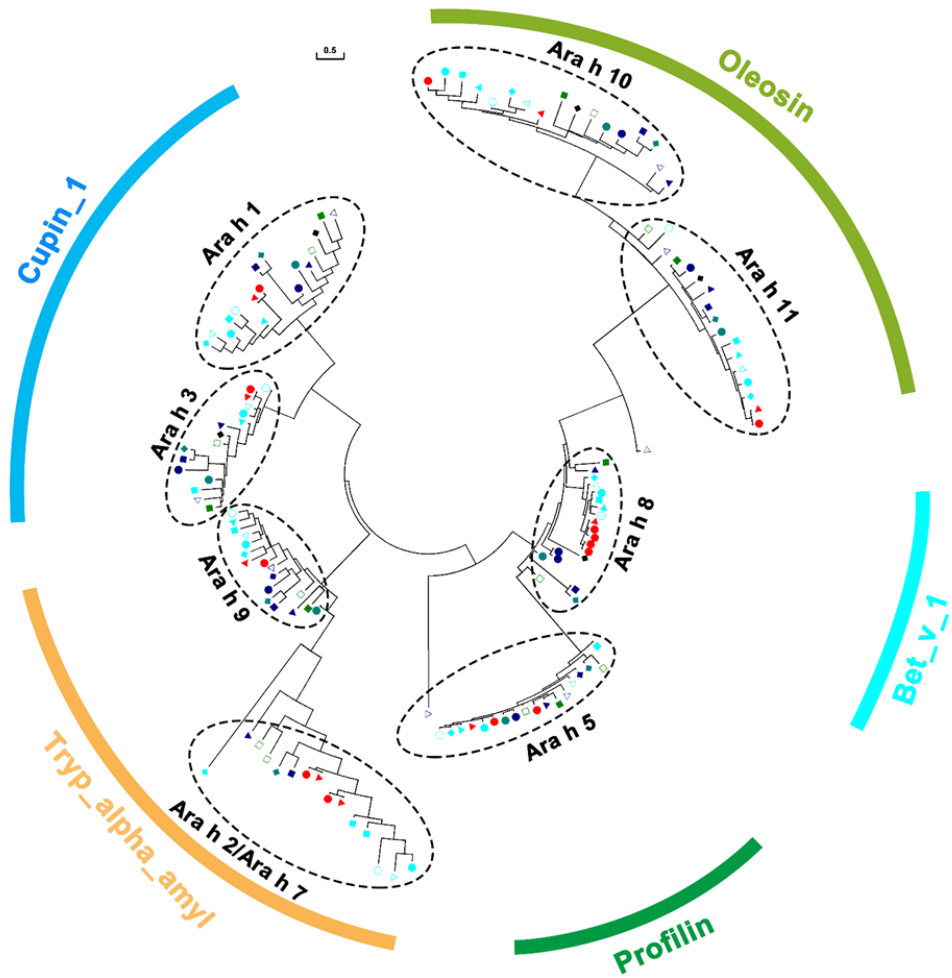

- *A. duranensis*    ▲ *A. hypogaea*    ● Soybean    ■ Medicago    ▲ Lotus    ◆ Common bean
- Chickpea    △ Pigeonpea    ◆ Canola    ● Cotton    □ Castor    ■ Linseed
- Arabidopsis    ● Apple    ◆ Poplar    ▲ Tomato    △ Rice

**Figure S31. Phylogenetic tree of *Ara h 1-11* allergens, including sequences from previously identified homologs from cultivated peanut and other species.**

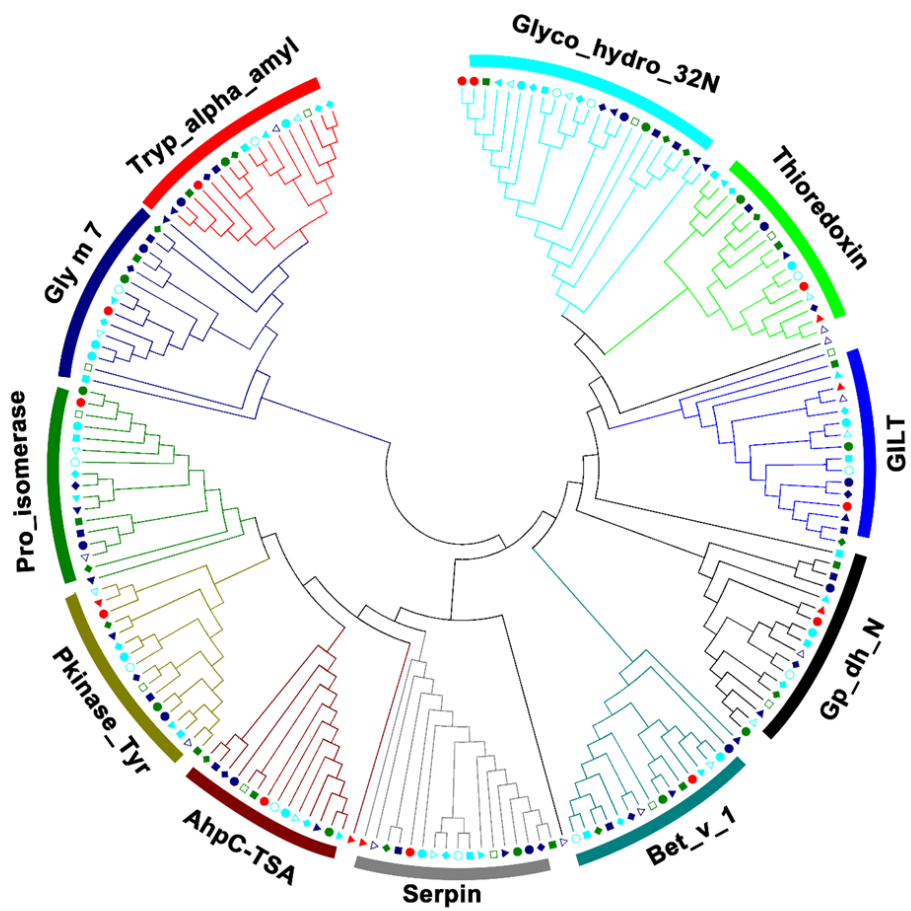

- |                        |             |           |            |          |               |
|------------------------|-------------|-----------|------------|----------|---------------|
| ● <i>A. duranensis</i> | ▲ wheat     | ● Soybean | ■ Medicago | ▲ Lotus  | ◆ Common bean |
| ○ Chickpea             | △ Pigeonpea | ◆ Canola  | ● Cotton   | □ Castor | ■ Linseed     |
| ■ Arabidopsis          | ● Apple     | ◆ Poplar  | ▲ Tomato   | △ Rice   |               |

**Figure S32. Phylogenetic tree of newly identified putative allergens in *A. duranensis* and the homologous proteins in other plant species.**

## SI References

1. Stalker, H.T. et al. Genetic diversity within the species *Arachis duranensis* Krapov. & W.C. Gregory, a possible progenitor of cultivated peanut. *Genome* **38**, 1201-1212 (1995).
2. Simpson, C.E. et al. History of *Arachis* including evidence of *A. hypogaea* L. progenitors. *Peanut Sci* **28**, 78-80 (2001).
3. Doyle, J.J. & Doyle, J.L. Isolation of plant DNA from fresh tissue. *Focus (Gico-BRL)* **12**, 13-15 (1990).
4. Luo, R. et al. SOAPdenovo2: an empirically improved memory-efficient short-read de novo assembler. *GigaScience* **1**, 18, doi:10.1186/2047-217X-1-18 (2012).
5. Boetzer, M. et al. Scaffolding pre-assembled contigs using SSPACE. *Bioinformatics* **27**, 578-9 (2010).
6. Li, R. et al. The sequence and de novo assembly of the giant panda genome. *Nature* **463**, 311-7 (2010).
7. Chen, X. et al. Deep sequencing analysis of the transcriptomes of peanut aerial and subterranean young pods identifies candidate genes related to early embryo abortion. *Plant Biotechnol J* **11**, 115-127 (2013).
8. Ning, Z. et al. SSAHA: a fast search method for large DNA databases. *Genome Res* **11**, 1725-1729 (2001).
9. Temsch, E.M. & Greilhuber, J. Genome size in *Arachis duranensis*: a critical study. *Genome* **44**, 826-30 (2001).
10. Cantarel, B.L. et al. MAKER: an easy-to-use annotation pipeline designed for emerging model organism genomes. *Genome Res* **18**, 188-96 (2008).
11. Marchler-Bauer, A. et al. CDD: NCBI's conserved domain database. *Nucleic Acids Res* **43**, D222-6 (2015).
12. Finn, R.D. et al. Pfam: the protein families database. *Nucleic Acids Res* **42**, D222-230 (2014).
13. Sonnhammer, E.L. et al. Pfam: a comprehensive database of protein domain families based on seed alignments. *Proteins* **28**, 405-20 (1997).
14. Harris, M.A. et al. The Gene Ontology (GO) database and informatics resource. *Nucleic Acids Res* **32**, D258-61 (2004).
15. Kanehisa, M. et al. The KEGG resource for deciphering the genome. *Nucleic Acids Res* **32**, D277-80 (2004).
16. Jones, P. et al. InterProScan 5: genome-scale protein function classification. *Bioinformatics* **30**, 1236-40 (2014).
17. Zdobnov, E.M. & Apweiler, R. InterProScan--an integration platform for the signature-recognition methods in InterPro. *Bioinformatics* **17**, 847-8 (2001).
18. Maere, S. et al. BiNGO: a cytoscape plugin to assess overrepresentation of gene ontology categories in biological networks. *Bioinformatics* **21**, 3448-9 (2005).
19. Purugganan, M.D. et al. Molecular evolution of flower development: diversification of the plant MADS-box regulatory gene family. *Genetics* **140**, 345-56 (1995).
20. Li, L. et al. OrthoMCL: identification of ortholog groups for eukaryotic genomes. *Genome Res* **13**, 2178-89 (2003).
21. Lavin, M. et al. Evolutionary rates analysis of Leguminosae implicates a rapid diversification of lineages during the tertiary. *Syst Biol* **54**, 575-94 (2005).
22. Burge, S.W. et al. Rfam 11.0: 10 years of RNA families. *Nucleic Acids Res* **41**, D226-232 (2012).
23. Lowe, T.M. & Eddy, S.R. tRNAscan-SE: a program for improved detection of transfer RNA genes in genomic sequence. *Nucleic Acids Res* **25**, 955-64 (1997).
24. Lagesen, K. et al. RNAmmer: consistent and rapid annotation of ribosomal RNA genes. *Nucleic Acids Res* **35**, 3100-8 (2007).
25. Nawrocki, E.P. et al. Infernal 1.0: inference of RNA alignments. *Bioinformatics* **25**, 1335-7 (2009).
26. Jeong, D.H. et al. Massive analysis of rice small RNAs: mechanistic implications of regulated microRNAs and variants for differential target RNA cleavage. *Plant Cell* **23**, 4185-207 (2011).
27. Benson, G. Tandem repeats finder: a program to analyze DNA sequences. *Nucleic Acids Res* **27**, 573-80 (1999).
28. Smit, A.F.A. & Hubley, R. RepeatModeler Open-1.0. (2010). <http://www.repeatmasker.org>
29. Jurka, J. et al. Repbase Update, a database of eukaryotic repetitive elements. *Cytogenet Genome Res* **110**, 462-467 (2005).
30. Wicker, T. et al. A unified classification system for eukaryotic transposable elements. *Nat Rev Genet* **8**, 973-82 (2007).
31. Piegu, B. et al. Doubling genome size without polyploidization: dynamics of retrotransposition-driven genomic expansions in *Oryza australiensis*, a wild relative of rice. *Genome Res* **16**, 1262-9 (2006).
32. SanMiguel, P. et al. The paleontology of intergene retrotransposons of maize. *Nat Genet* **20**, 43-5 (1998).
33. Li, W. & Godzik, A. Cd-hit: a fast program for clustering and comparing large sets of protein or nucleotide sequences. *Bioinformatics* **22**, 1658-1659 (2006).
34. Kimura, M. A simple method for estimating evolutionary rates of base substitutions through comparative studies of nucleotide sequences. *J Mol Evol* **16**, 111-20 (1980).

35. Ma, J. & Bennetzen, J.L. Rapid recent growth and divergence of rice nuclear genomes. *Proc Natl Acad Sci U S A* **101**, 12404-10 (2004).
36. Thiel T, Michalek W, Varshney RK, Graner A: Exploiting EST databases for the development and characterization of gene-derived SSR-markers in barley (*Hordeum vulgare* L.). *Theor Appl Genet* **106(3)**, 411-422 (2003).
37. Li, H. & Durbin, R. Fast and accurate short read alignment with Burrows-Wheeler transform. *Bioinformatics* **25**, 1754-60 (2009).
38. Li, H. et al. The sequence alignment/map format and SAMtools. *Bioinformatics* **25**, 2078-9 (2009).
39. Kumar, S. et al. MEGA: a biologist-centric software for evolutionary analysis of DNA and protein sequences. *Brief Bioinform* **9**, 299-306 (2008).
40. Young, N.D. et al. The *Medicago* genome provides insight into the evolution of rhizobial symbioses. *Nature* **480**, 520-4 (2011).
41. Schmutz, J. et al. Genome sequence of the palaeopolyploid soybean. *Nature* **463**, 178-183 (2010).
42. Jaillon, O. et al. The grapevine genome sequence suggests ancestral hexaploidization in major angiosperm phyla. *Nature* **449**, 463-7 (2007).
43. Wang, Y. et al. MCScanX: a toolkit for detection and evolutionary analysis of gene synteny and collinearity. *Nucleic Acids Res* **40**, e49 (2012).
44. Yang, Z. PAML 4: phylogenetic analysis by maximum likelihood. *Mol Biol Evol* **24**, 1586-91 (2007).
45. Guo, H. et al. Extensive and biased intergenomic nonreciprocal DNA exchanges shaped a nascent polyploid genome, *Gossypium* (cotton). *Genetics* **197**, 1153-63 (2014).
46. Kurtz, S. et al. Versatile and open software for comparing large genomes, *Genome Biology*, **5**, R12 (2004).
47. Beckstette, M. et al. Fast index based algorithms and software for matching position specific scoring matrices. *BMC Bioinformatics* **7**, 389 (2006)
48. Proost, S. et al. i-ADHoRe 3.0--fast and sensitive detection of genomic homology in extremely large data sets. *Nucleic Acid Research* **40(2)**, e11 (2012).
49. Krzywinski, M. et al. Circos: an information aesthetic for comparative genomics. *Genome Res* **19**, 1639-1645 (2009).
50. Kato, T. et al. SGR2, a phospholipase-like protein, and ZIG/SGR4, a SNARE, are involved in the shoot gravitropism of *Arabidopsis*. *Plant Cell* **14**, 33-46 (2002).
51. Yano, D. et al. A SNARE complex containing SGR3/AtVAM3 and ZIG/VTI11 in gravity-sensing cells is important for *Arabidopsis* shoot gravitropism. *Proc Natl Acad Sci USA* **100**, 8589-94 (2003).
52. Silady, R.A. et al. The gravitropism defective 2 mutants of *Arabidopsis* are deficient in a protein implicated in endocytosis in *Caenorhabditis elegans*. *Plant Physiol* **136**, 3095-103 (2004).
53. Sedbrook, J.C. et al. ARG1 (altered response to gravity) encodes a DnaJ-like protein that potentially interacts with the cytoskeleton. *Proc Natl Acad Sci USA* **96**, 1140-5 (1999).
54. Harrison, B.R. & Masson, P.H. ARL2, ARG1 and PIN3 define a gravity signal transduction pathway in root statocytes. *Plant J* **53**, 380-92 (2008).
55. Morita, M.T. et al. A C2H2-type zinc finger protein, SGR5, is involved in early events of gravitropism in *Arabidopsis* inflorescence stems. *Plant J* **47**, 619-28 (2006).
56. Young, L.S. et al. Adenosine kinase modulates root gravitropism and cap morphogenesis in *Arabidopsis*. *Plant Physiol* **142**, 564-73 (2006).
57. Caspar, T. & Pickard, B.G. Gravitropism in a starchless mutant of *Arabidopsis*: Implications for the starch-stanolith theory of gravity sensing. *Planta* **177**, 185-97 (1989).
58. Withers, J.C. et al. Gravity persistent signal 1 (GPS1) reveals novel cytochrome P450s involved in gravitropism. *Am J Bot* **100**, 183-93 (2013).
59. Bennett, M.J. et al. *Arabidopsis* AUX1 gene: a permease-like regulator of root gravitropism. *Science* **273**, 948-50 (1996).
60. Swarup, R. et al. Structure-function analysis of the presumptive *Arabidopsis* auxin permease AUX1. *Plant Cell* **16**, 3069-83 (2004).
61. Friml, J. et al. Lateral relocation of auxin efflux regulator PIN3 mediates tropism in *Arabidopsis*. *Nature* **415**, 806-9 (2002).
62. Noh, B. et al. Enhanced gravi- and phototropism in plant *mdr* mutants mislocalizing the auxin efflux protein PIN1. *Nature* **423**, 999-1002 (2003).
